# Supplementary material for: Greenhouse gas emissions and reactive nitrogen releases from rice production with simultaneous incorporation of wheat straw and nitrogen fertilizer
Source: Copernicus journal article supplement (doi:10.5194/bg-2015-620), 2016-01-18
Supplement: Supplementary file [file bg-2015-620-AC4-supplement.pdf]

**Greenhouse gas emissions and reactive nitrogen releases from rice production with simultaneous incorporation of wheat straw and nitrogen fertilizer**

Longlong Xia<sup>a,b</sup>, Yongqiu Xia<sup>a</sup>, Shutan Ma<sup>a,b</sup>, Jinyang Wang<sup>a</sup>, Shuwei Wang<sup>a,b</sup>, Wei Zhou<sup>a,b</sup>, Xiaoyuan Yan<sup>a\*</sup>

<sup>a</sup>. State Key Laboratory of Soil and Sustainable Agriculture, Institute of Soil Science, Chinese Academy of Sciences, Nanjing 210008, China.

<sup>b</sup>. University of Chinese Academy of Sciences, Beijing 100049, China.

**\*Corresponding author:** Xiaoyuan Yan

State Key Laboratory of Soil and Sustainable Agriculture, Institute of Soil Science, Chinese Academy of Sciences, Nanjing 210008, P. R. China

Phone number: +86 025 86881530, Fax: +86 025 86881000

Email address: yanxy@issas.ac.cn

带格式的: 字体: 11 磅

## Abstract

~~The impacts~~Impacts of simultaneous inputs of crop straw and nitrogen (N) fertilizer on greenhouse gas (GHG) emissions and ~~reactive nitrogen (Nr) releases~~N losses from rice production ~~in intensive agricultural regions~~are not well understood. A two-year field experiment was established in a rice–wheat cropping system in the Taihu Lake region (TLR) of China ~~since 2013~~ to evaluate the GHG intensity (GHGI), ~~Nr~~reactive N intensity (NrI) ~~and environmental costs~~ of ~~concurrent rice production with~~ inputs of wheat straw and N fertilizer ~~to rice paddies~~. The field experiment included five treatments of different N fertilization rates for rice production: 0 (RN0), 120 (RN120), 180 (RN180), 240 (RN240) and 300 kg N ha<sup>-1</sup> (RN300, traditional N applied rate in the TLR). Wheat straws were fully incorporated into soil before rice transplantation ~~in all treatments~~. The ~~results~~meta-analytic technique was employed to evaluate various Nr losses. Results showed that the response of rice yield to N ~~application~~rate successfully fitted a quadratic model. ~~Nitrous oxide (N<sub>2</sub>O) emissions were increased exponentially as~~, while N fertilization rates increased, while methane (CH<sub>4</sub>) emissions increased slightly with wheat straw rates increased. The estimated soil organic carbon sequestration rate varied from 129.58 (RN0) to 196.87 kg C ha<sup>-1</sup> yr<sup>-1</sup> (RN300). ~~Seasonal average~~promoted Nr discharges exponentially (nitrous oxide emission, N leaching and runoff) or linearly (ammonia volatilization). The GHGI of rice production ranged from 1.20 (RN240) to 1.61 ~~(RN0)~~ kg CO<sub>2</sub>-equivalent (CO<sub>2</sub>-eq) kg<sup>-1</sup> ~~(RN0)~~, while NrI varied from 2.14 (RN0) to 10.92 ~~(RN300)~~ g N kg<sup>-1</sup> ~~(RN300)~~. ~~Methane (CH<sub>4</sub> emissions) emission~~ dominated GHGI with proportion of 70.2–88.6% ~~due to direct straw incorporation~~, while ammonia (NH<sub>3</sub>) volatilization dominated NrI with proportion of 53.5–57.4% ~~in all fertilization treatments~~. ~~The damage~~. Damage costs to environment incurred by GHG and Nr releases from

带格式的: 字体: 11 磅

带格式的: 字体颜色: 自动设置

带格式的: 英语 (英国)

---

current rice production (RN300) accounted for 8.8% and 4.9% of ~~farmer's~~farmers' incomes, respectively. Cutting ~~the traditional N~~ application rate ~~of N fertilizer~~ from 300 ~~(traditional N rate)~~ to 240 kg N ha<sup>-1</sup> ~~improved~~could improve rice yield and nitrogen use efficiency by 2.14% and 10.30%, respectively, whilst simultaneously reduced GHGI by 13%, NrI by 23% and total environmental costs by 16%. Moreover, the reduction of 60 kg N ha<sup>-1</sup> improved ~~farmer's~~farmers' income by 639 ¥ha<sup>-1</sup>, which would provide them with an incentive to change ~~their traditional the~~ current N application rate. Our study suggests that GHG and Nr releases, especially ~~the~~ CH<sub>4</sub> emission and NH<sub>3</sub> volatilization, from rice production in the TLR could be further ~~curbed~~reduced, considering the current incorporation pattern of wheat straw and N fertilizer.

Key words: Taihu Lake region, greenhouse gas intensity, Nr intensity, rice production, straw incorporation

## 1 Introduction

Rice is the staple food for the majority of the world's population. However, while industriously feeding the ~~world's~~global population, rice production is an important source of greenhouse gas (GHG) emissions and reactive nitrogen (Nr) releases (Yan et al., 2009; Chen et al., 2014). Rice production in China involves heavy methane (CH<sub>4</sub>) emissions due to ~~current~~the water regime ~~management~~managements (e.g., continuous flooding in some regions) and straw incorporation practices (e.g., direct incorporation without any pretreatments) (Yan et al., 2009). Besides, ~~the~~ lower nitrogen use efficiency for rice cultivation in China (approximately 31%) aggravates the release of various Nr species, thus threatening ecosystem functions (Galloway et al., 2008; Zhang et al., 2012). Such a dilemma highlights the need for the simultaneous evaluation of GHG emissions and Nr losses for rice production in China. ~~And rice~~Rice cultivation in intensive agricultural regions, characterized by high inputs of N fertilizer and crop residues, should be prioritized for the implementation of such evaluation (Ju et al., 2009; Chen et al., 2014).

Taihu Lake region (TLR) is one of the most productive areas for rice production in China, largely owing to the popularity of intensive cultivation (Zhao et al., 2012a; Zhao et al., 2012b). Currently, rice yield of this region in some fields can reach up to 8000 kg ha<sup>-1</sup> or even higher (Ma

带格式的: 字体: 11 磅

---

et al., 2013; Zhao et al., 2015). However, these grain yields are achieved with a cost to environment (Ju et al., 2009). TLR generally receives 550–600 kg N ha<sup>-1</sup> yr<sup>-1</sup>, with the rice-growing season accounting for nearly 300 kg N ha<sup>-1</sup> (Zhao et al., 2012b). Besides from these excessive N inputs, TLR also experiences high amounts of crop residue incorporation, which is highly encouraged by local governments (Xia et al., 2014). However, direct straw incorporation before rice transplantation triggers substantial CH<sub>4</sub> emissions (Ma et al., 2009; Ma et al., 2013). Besides such substantial releases of Nr and ~~GHGs~~GHG in a direct way, indirect releases during the production of various agricultural materials used for farming operations ~~in the TLR~~, are also not ignorable, due to higher input rates of these materials caused by intensive cultivation (Zhang et al., 2013; Cheng et al., 2014). This warrants the need for life-cycle assessment (LCA) of GHG emissions and Nr releases with respect to rice production in this region.

Considerable environmental costs can be caused by the direct and indirect releases of ~~GHGs~~GHG and Nr from rice production in the TLR, for instance, in the form of global warming, water eutrophication, or soil acidification (Ju et al., 2009; Xia and Yan, 2011; Xia and Yan, 2012). Previous studies have proven that environmental costs assessment could provide guidance for emerging policy priorities in mitigating certain GHG or Nr species, after quantifying both their release amounts and damage costs to ecosystems (Gu et al., 2012). However, few studies have attempted to evaluate the ~~life-cycle assessment of~~ total GHG and Nr releases, and the associated environmental costs ~~they incur from rice production in the TLR under the current conditions of,~~ with high inputs of N fertilizer and crop straw, ~~are scarce.~~

In the present study, we conducted two years of simultaneous measurements of CH<sub>4</sub> and nitrous oxide (N<sub>2</sub>O) emissions from a rice-wheat cropping system in the TLR to evaluate the

impacts of simultaneous inputs of crop straw and N fertilizer on (1) net global warming potential (NGWP) and GHG intensity (GHGI), (2) total Nr losses and Nr intensity (NrI), (3) environmental costs incurred by these GHG and Nr releases ~~of~~associated with rice production, from the perspective of ~~life-cycle assessment~~LCA.

## 2 Materials and methods

### 2.1 Experimental site

The field experiment was conducted in a paddy rice field at Changshu Agroecological Experimental Station (31°32'93"N, 120°41'88"E) in Jiangsu province, which is located in the TLR of China where the cropping system is primarily dominated by summer rice (*Oryza sativa* L.) and winter wheat (*Triticum aestivum* L.) rotation. The climate of the study area is subtropical monsoon, with a mean air temperature of 16.1 °C and mean annual precipitation of 990 mm, of which 60–70% occurs during the rice-growing season. The daily mean temperature and precipitation during two rice-growing seasons from 2013 to 2014 are shown in Fig.1. The paddy soil is classified as ~~an~~Anthrosol, which develops from lacustrine sediments. The topsoil (0–20cm) has a pH of 7.68 (H<sub>2</sub>O). The bulk density is 1.16 g cm<sup>-3</sup>, the organic C content is 20.1 g C kg<sup>-1</sup>, the total N is 1.98 g kg<sup>-1</sup>, the available P is 11.83 mg kg<sup>-1</sup> and the available K is 126 mg kg<sup>-1</sup>.

### 2.2 Experimental design and field management

The field experiment included five treatments of different N fertilization rates for rice production: 0 (RN0), 120 (RN120), 180 (RN180), 240 (RN240) and 300 kg N ha<sup>-1</sup> (RN300, traditional N applied rate in the TLR). Consistent with local practices, wheat straws were harvested, chopped and fully incorporated into soil before rice transplantation in all treatments (Table 1). All of the treatments are laid out in a randomized block design with three replicates, and

带格式的: 字体: 11 磅

带格式的: 字体: 11 磅, 字体颜色: 自动设置, 英语(美国)

带格式的: 字体: 11 磅

each plot covered an area of 3 m × 11 m (33 m<sup>2</sup>).

Rice is transplanted in the middle of June and harvested at the beginning of November. N fertilizer (in the form of urea) was split into three parts during the rice-growing season: 40% as basal fertilizer, 30% as ~~tillering~~tiller fertilizer, and 30% as panicle fertilizer. Phosphorus (in the form of calcium superphosphate) and potassium (in the form of potassium chloride) were applied as basal fertilizer at rates of 30 kg P<sub>2</sub>O<sub>5</sub> ha<sup>-1</sup> and 60 kg K<sub>2</sub>O ha<sup>-1</sup>, respectively. All basal fertilizers were thoroughly incorporated into the soil through plowing, while topdressing fertilizers were applied evenly to the soil surface. According to local practices, the water regime of ‘flooding-midseason drainage-flooding-moist but non-waterlogged by intermittent irrigation’ was adopted. Details of the specific agricultural management practices for rice production are provided in Table 1.

### 2.3 Gas fluxes and topsoil organic carbon sequestration rate

The CH<sub>4</sub> and ~~nitrous oxide~~ (N<sub>2</sub>O) fluxes during the rice-growing seasons of 2013 and 2014 were measured using a static chamber and gas chromatography technique. Details of the procedures used for sampling and analysis the gases were described in Xia et al. (2014).

~~Considering the fact that~~Generally, it takes long-term observations over years to decades before the soil organic carbon ~~sequestration rate (SOCSR)~~(SOC) change is detectable (Yan et al., 2011). The SOC content changes of ~~this~~ short-term field experiment ~~could not~~couldn't be correctly measured ~~directly, due to the high variability of SOC during the preliminary several years of the experiment. Therefore,~~ we used the following relationship between the straw input rate (kg C ha<sup>-1</sup> yr<sup>-1</sup>) and SOC sequestration rate (SOCSR) (kg C ha<sup>-1</sup> yr<sup>-1</sup>), obtained ~~via~~through an on-going long-term straw application experiment in the same region, to calculate the SOCSR in this study:

带格式的: 字体: 11 磅

(Xia et al., 2014):

$$\text{SOC SR} = \text{Straw input rate} \times 0.0603 + 31.39 \quad (R^2 = 0.92); \quad (1)$$

This on-going long-term field experiment is also taking place at the Changshu Agroecological Experimental Station (since 1990), which includes three straw application levels:

0, 4.5 t, and 9.0 t dry-weight  $\text{ha}^{-1} \text{yr}^{-1}$  and the N application rate for rice cultivation in these treatments is  $180 \text{ kg N ha}^{-1}$ . The estimated SOC SR (from 1990 to 2012) for these three treatments was 10.65, 194.96 and  $254.83 \text{ kg C ha}^{-1} \text{yr}^{-1}$  (Xia et al., 2014). The equation (1) was established

based on above straw input rates and the estimated SOC SR. We used the average straw input rates the results of the two rice growing seasons to estimate the SOC SR. The on-going long term experiment and the experiment in this study received similar 22-year observation (Xia et al., 2014).

Same agricultural managements. Details of management practices were applied to the on-going long-term experiment are described in Xia et al. (2014) and the experiment of this study.

#### 2.4 Net global warming potential and greenhouse gas intensity

The net global warming potential (NGWP,  $\text{kg CO}_2 \text{ eq ha}^{-1}$ ) and greenhouse gas intensity (GHGI,  $\text{kg CO}_2 \text{ eq kg}^{-1}$ ) of rice production in the TLR was calculated using the following equations:

$$\text{NGWP} = \sum_{i=1}^m \text{AI}_{\text{ico}_2} + \text{CH}_4 \times 25 + \text{N}_2\text{O} \times 44/28 \times 298 - \text{SOC SR} \times 44/12; \quad (2)$$

$$\text{GHGI} = \text{NGWP}/\text{rice yield}; \quad (3)$$

Here,  $\text{AI}_{\text{ico}_2}$  denotes the GHG emissions from the production and transportation of agricultural inputs, which are calculated by multiplying their application rates by their individual GHG emission factors, such as synthetic fertilizers, diesel oil, electricity and pesticides (Liang, 2009; Zhang et al., 2013).  $\text{CH}_4$  ( $\text{kg CH}_4 \text{ ha}^{-1}$ ),  $\text{N}_2\text{O}$  ( $\text{kg N ha}^{-1}$ ) and SOC SR ( $\text{kg C ha}^{-1} \text{yr}^{-1}$ ) represent

带格式的: 字体颜色: 文字 1

带格式的: 字体: 五号, 字体颜色: 文字 1

带格式的: 字体: 11 磅



the CH<sub>4</sub> ~~emissions~~ and N<sub>2</sub>O emissions from rice production, and the SOC sequestration rate, respectively.

## 2.5 Total Nr losses and Nr intensity

The total Nr losses (kg N ha<sup>-1</sup>) and Nr intensity (NrI, g N kg<sup>-1</sup>) were calculated using the following equations:

$$\text{Total Nr losses} = \sum_{i=1}^m \text{AI}_{i\text{Nr}} + (\text{NH}_3 + \text{N}_2\text{O} + \text{N}_{\text{Leaching}} + \text{N}_{\text{Runoff}})_{\text{rice}}; \quad (4)$$

$$\text{NH}_3 \text{ volatilization} = 0.17 \times \frac{\text{N fertilizer rate}}{\text{N}_{\text{rate}}} \times \text{N}_{\text{rate}} + 0.64;$$

(5)

$$\text{N runoff} = 5.39 \times \exp \left( \frac{\text{N fertilizer rate}}{\text{N}_{\text{rate}}} \right) \times \text{N}_{\text{rate}} + (0.0054 \times \frac{\text{N fertilizer rate}}{\text{N}_{\text{rate}}}) \times \text{N}_{\text{rate}};$$

(6)

$$\text{N leaching} = 1.44 \times \exp \left( \frac{\text{N fertilizer rate}}{\text{N}_{\text{rate}}} \right) \times \text{N}_{\text{rate}} + (0.0037 \times \frac{\text{N fertilizer rate}}{\text{N}_{\text{rate}}}) \times \text{N}_{\text{rate}};$$

(7)

$$\text{NrI} = (1000 \times \text{Total Nr losses}) / \text{rice yield}; \quad (8)$$

Here,  $\text{AI}_{i\text{Nr}}$  denotes the Nr lost (mainly through N<sub>2</sub>O and NO<sub>x</sub> emissions) from the production and transportation of agricultural inputs (Liang, 2009; Zhang et al., 2013), while '(NH<sub>3</sub>+N<sub>2</sub>O+N<sub>Leaching</sub>+N<sub>Runoff</sub>)<sub>rice</sub>' represents the NH<sub>3</sub> volatilization, N<sub>2</sub>O emissions, N leaching and runoff during the rice-growing season. ~~We conducted~~ N<sub>rate</sub> represents the N fertilizer application rate. Nr empirical models (Equation 5, 6, 7) derived from a meta-analysis of published literature ~~to establish Nr empirical models to stimulate the concerning~~ Nr losses, such as NH<sub>3</sub> volatilization (Equation 5), N leaching and runoff (Equation 6 and 7), from different treatments from rice production in the TLR. Specific details regarding this literature survey are provided in Appendix A.

带格式的: 字体: 11 磅

## 2.6 Total environmental costs incurred by GHG and Nr releases and farmer's income

The total environmental costs ( $\text{¥ ha}^{-1}$ ) incurred by GHG and Nr releases and farmer's income from rice production in the TLR ~~was~~were calculated based on the following equations:

$$\text{Environmental costs} = \sum_{i=1}^n (\text{Nr}_i \text{A} \times \text{DC}_i) + \text{CO}_2 \text{A} \times \text{DC}_{\text{CO}_2}; \quad (9)$$

$$\text{Farmer's income} = \text{rice yield} \times \text{rice price} - \text{input costs}; \quad (10)$$

$\text{Nr}_i \text{A}$  (kg N) represents the release amounts of certain Nr species (i), and  $\text{DC}_i$  ( $\text{¥ kg}^{-1}$  N) denotes the damage cost (DC) per kg of certain Nr (i).  $\text{CO}_2 \text{A}$  (ton) and  $\text{DC}_{\text{CO}_2}$  ( $\text{¥ ton}^{-1}$ ) represent the  $\text{CO}_2$  emissions amount and global warming cost of  $\text{CO}_2$ , respectively.  $\text{N}_2\text{O}$  is both a GHG and ~~an~~ Nr species, but its environmental cost was calculated as a GHG here. Because the cost of  $\text{N}_2\text{O}$  emission as Nr species is to damage human health (Gu et al., 2012), but the effects of Nr losses on the damage costs of human health were not included in this study. The environmental costs mainly refer to the global warming incurred by GHG emissions, soil acidification incurred by  $\text{NH}_3$  and  $\text{NO}_x$  emissions, and aquatic eutrophication caused by  $\text{NH}_3$  emissions, N leaching and runoff (Xia and Yan, 2012).

## 2.7 Nitrogen use efficiency and $\text{N}_2\text{O}$ emission factor

Nitrogen use efficiency (NUE) ~~is~~and  $\text{N}_2\text{O}$  emission factor ( $\text{EF}_d\%$ ) were respectively calculated by the following ~~equation~~equations (Ma et al., 2013; Yan et al., 2014):

$$\text{NUE} = (\text{U}_\text{N} - \text{U}_0) / \text{F}_\text{N}; \quad (11)$$

$$\text{EF}_d\% = (\text{E}_\text{N} - \text{E}_0) / \text{F}_\text{N}; \quad (12)$$

Here,  $\text{U}_\text{N}$  is the plant N uptake ( $\text{kg ha}^{-1}$ ) measured in aboveground biomass at physiological maturity in the N fertilization treatments, while  $\text{U}_0$  is the N uptake measured in aboveground biomass in the treatment without N fertilizer addition (RN0).  $\text{E}_\text{N}$  denotes the cumulative  $\text{N}_2\text{O}$

带格式的: 字体: 11 磅

带格式的: 字体: 11 磅

emissions in the N fertilization treatments, while  $E_0$  denotes the  $N_2O$  emissions in the RN0.  $E_N$  represents the application rate of N fertilizer. The N uptake in straw and grain was analysed via concentrated sulfuric acid digestion and the Kjeldahl method (Zhao et al., 2015).

## 2.8 Statistical analysis

Differences in seasonal  $CH_4$ ,  $N_2O$  emissions and rice yield of the two rice-growing seasons from 2013 to 2014 affected by fertilizer treatments, year and their interaction were examined by using a two-way analysis of variance (ANOVA) (Table 2). The grain yield, seasonal  $CH_4$  and  $N_2O$  emissions, SOCSR and GHGI of the different treatments were tested by analysis of variance, and mean values were compared by least significant difference (LSD) at the 5% level. All these analyses were carried out using the SPSS (Version 19.0, USA).

## 3 Results and discussion

### 3.1 Rice yield and NUE

The two-way ANOVA analyses indicated that the rice grain yields were significantly affected by the year and fertilizer treatment (Table 2). The farmer's practice plot (RN300) had an average rice grain yield of  $8395 \text{ kg ha}^{-1}$ , with an NUE of 31.35%, over the two growing seasons from 2013 to 2014. Compared with RN300, reducing the N fertilizer rate by 20% (RN240) slightly improved the grain yield and NUE to  $8576 \text{ kg ha}^{-1}$  and 34.58%, respectively. Further N reduction, without additional agricultural managements, could decrease the rice yield by 8.15% (RN180) and 15.18% (RN120) (Table 3). The response of rice yield to the synthetic N application rate in our study successfully fitted a quadratic model (Fig.2), as has been reported in previous studies (Xia and Yan, 2012; Cui et al., 2013a). Reducing N application to a reasonable rate reasonably, therefore, is considered essential to reduce environmental costs, without sacrificing grain yield

带格式的: 字体: 11 磅

带格式的: 字体: 11 磅

(Chen et al., 2014). ~~Lowering~~Our study showed that lowering the N input adopted by local farmer (300 kg N ha<sup>-1</sup>) by 20% could still enhance the grain yield and NUE, ~~without threatening food security in this study.~~ However, a further reduction of N 40% (RN180) would largely undermine the rice yield (Table 3).

Further reduction in N fertilizer may be achieved with improvements of agricultural managements, Ju et al. (2009) reported that, based on knowledge-based N managements, such as optimizing ~~the~~ N fertilizer source, rate, timing and place (in accordance with crop demand), rice grain yield in the TLR was not significantly affected by a 30–60% N saving, while various Nr losses would endure a two-fold curbing. Similarly, Zhao et al. (2015) found that the NUE could be improved from 31% to 44%, even under a N reduction of 25% for rice production in the TLR, through the implementation of integrated soil-crop system managements. In the present study, the NUE was improved by 10% via a 20% N reduction, but it still falls behind the NUE values in the studies which received knowledge-based N managements. Previous studies have proven that straw incorporation exerted little ~~positive~~ impacts on grain yield. For instance, a meta-analysis conducted by Singh et al. (2005) have found that incorporation of crop straw produced no significant trend in improving crop yield in rice-based cropping systems. Moreover, based on a long-term straw incorporation experiment established since 1990 ~~at Changshu Agroecological Experimental Station in the TLR~~, Xia et al. (2014) have reported that long-term incorporation of wheat straw only increased the rice yield by 1%. Therefore, in the present study, the effects of straw incorporation on rice yield were considered as inappreciable.

### 3.2 CH<sub>4</sub>, N<sub>2</sub>O emissions and SOSCR

Over the two rice-growing seasons from 2013 to 2014, all treatments ~~produced~~showed

带格式的: 字体: 11 磅

similar patterns of CH<sub>4</sub> fluxes, albeit with large inter-annual variation (Fig.3a). The seasonal average CH<sub>4</sub> emissions from all plots showed no significant difference, ranging from 289.53 kg CH<sub>4</sub> ha<sup>-1</sup> in the RN180 plot to 334.61 kg CH<sub>4</sub> ha<sup>-1</sup> in the RN120 plot (Table 4), much higher than observations conducted in the same region (Zou et al., 2005; Ma et al., 2013). This phenomenon can be attributed to the larger amounts of straw incorporation in this study (Table 1). Relative to the RN300 plot, CH<sub>4</sub> emissions from the RN240 plot decreased by 8% and 10%, during the rice-growing season of 2013 and 2014, respectively, although this effect was not statistically significant (Table 4).

Many studies have shown a clear linear relationship between CH<sub>4</sub> emissions and the amounts of applied organic matter (OM). ~~Such an obvious linear relationship generally occurs under the following conditions: first, the OM inputs are low (generally less than 3 Mg dry matter ha<sup>-1</sup>) (Zou et al., 2005; Ma et al., 2013); second, the applied OM rates among different treatments are statistically different (Shang et al., 2011; Xia et al., 2014). (Shang et al., 2011; Xia et al., 2014).~~ It is possible that the linear response of CH<sub>4</sub> emissions to OM inputs can become flat or even unobvious (Fig.S1), when ~~OM is applied at higher rates (in this study, the applied rates of straw in all N fertilization treatments were higher than 4.4 Mg dry matter ha<sup>-1</sup>) and these rates among treatments were not statistically different. Besides, the experimental error caused by small differences in water conditions among different treatments may also have promoted the unclear response of CH<sub>4</sub> emissions to straw inputs in this study (Xia et al., 2014).~~

the OM applied rates among different treatments were insignificant different (Table S1). It is unsurprising that no obvious relationship between CH<sub>4</sub> emissions and N fertilizer application rates was observed in this study (Fig.S1), because the effects of N fertilization on CH<sub>4</sub> production,

transportation and oxidation are complex. For instance, N fertilization can provide methanogens with more carbon substrates in the rhizosphere of plants by stimulating the growth of rice biomass, thus promoting CH<sub>4</sub> production and transportation (Zou et al., 2005; Banger et al., 2012). On the other side, N enrichment could also enhance the activities of methanotrophs, therefore enhancing CH<sub>4</sub> oxidation (Xie et al., 2010; Yao et al., 2012). ~~Moreover, ammonium-based fertilizer could compete with CH<sub>4</sub> oxidation, due to the similar size and structure between NH<sub>4</sub><sup>+</sup> and CH<sub>4</sub> (Lingquist et al., 2012a).~~

The N<sub>2</sub>O fluxes were sporadic and pulse-like, and these fluxes showed large variations between different seasons, and the majority of the N<sub>2</sub>O peaks occurred after the application of N fertilizer (Fig.3b). The two-way ANOVA analyses indicated that the seasonal N<sub>2</sub>O emissions were significantly affected by the year, the fertilizer treatment, and their interactions during the rice-growing seasons (Table 2). The average N<sub>2</sub>O emission, during the two rice-growing seasons, ranged from 0.05 kg N ha<sup>-1</sup> for the RN0 to 0.35 kg N ha<sup>-1</sup> for the RN300 (Table 4), which increased exponentially as the N fertilizer rate increased; this highlights that the reduction of N fertilizer rate is an effective approach to reduce the N<sub>2</sub>O emissions (Zou et al., 2005; Zhang et al., 2012). The average N<sub>2</sub>O emission factors varied between 0.03% and 0.1%, with an average of 0.07%, which is comparable with previous studies (0.05%–0.1%) conducted in the same region (Ma et al., 2013; Zhao et al., 2015).

The rice paddies have witnessed an increase in the SOC stock as a result of straw incorporation (Table 4). The estimated topsoil (0–20cm) SOCSR varied from 0.43013 t C ha<sup>-1</sup> yr<sup>-1</sup> for the RN0 plot to 0.197 t C ha<sup>-1</sup> yr<sup>-1</sup> for the RN300 plot ~~(Table 4). The~~. The empirical model established through a long-term straw incorporation study in the same region was employed

to evaluate the SOCSR in this study, which likely brought uncertainty into the results of this study. Under the same agricultural managements, soil and climatic conditions, cropping systems and straw types, it is reasonable to believe that the rates of straw C stabilizing into SOC (i.e. conversion efficiency of crop residue C into SOC) are similar between these two experiments (Mandal et al., 2008). It is reported that the conversion rates of crop straw to SOC in two main wheat/maize production regions in China, which have similar climatic conditions and agricultural practices, were very close, at 40.524 versus 40.607 kg SOC-C t<sup>-1</sup> dry-weight straw (Lu et al., 2009). Moreover, the current estimated SOCSR for rice production in the TLR (0.197 t C ha<sup>-1</sup>), falling within the SOCSR range of 0.13–2.20 t C ha<sup>-1</sup> yr<sup>-1</sup> estimated by Pan et al. (2004) for paddy soils in China, is also comparable to the estimation of 0.17 t C ha<sup>-1</sup> yr<sup>-1</sup> from Ma et al. (2013) in a study based on a paddy field experiment with OM incorporation in the same region. Moreover, Therefore, we hold the provincial average opinion that the above SOCSR of Jiangsu province has been estimated to be 0.16–0.21 t C ha<sup>-1</sup> yr<sup>-1</sup> from the period of 1980 to 2000 (calculation method is appropriate, and the uncertainty incurred by this method unlikely affects the main conclusions of this study).

The magnitude of the SOC increase is variable depending on the straw incorporation method, the degree of tillage, the cropping systems and etc. (Yan et al., 2011; Huang & Sun, 2006; Liao et al., 2009), which is also similar to our estimation (Liu et al., 2013). Liu et al. (2014) suggested that straw incorporation in rice-based cropping systems requires an overall consideration, due to the direct incorporation promoting substantial CH<sub>4</sub> emissions. When converting to CO<sub>2</sub> eq, the SOCSR only offsets the CH<sub>4</sub> emissions by 6.2–9.2% in this study (Table 4). This proportion is expected to increase provided that appropriate straw incorporation method (e.g., compost straw

带格式的: 英语(英国)

带格式的: 英语(英国)

before incorporation) and conservative-tillage are adopted. Moreover, previous studies have shown that the combined adoption of conservative-tillage system with straw return had large advantages in increasing SOC stocks while reducing CH<sub>4</sub> emissions (Zhao et al., 2015a; Zhao et al., 2015b).

### 3.3 NGWP and GHGI

The average NGWP for all treatments varied from 8656 to 11550 kg CO<sub>2</sub> eq ha<sup>-1</sup> (Table 4). CH<sub>4</sub> emissions dominated the NGWP in all treatments, with the proportion ranging from 70.23% to 88.56%, while synthetic N fertilizer production was the secondary contributor (Table 4). In addition, SOC sequestration offset the positive GWP by 5.18–6.18% in the fertilization treatments. Compared to conventional practice (RN300), the NGWP in the 20% reduction N practice (RN240) decreased by 10.64%. Therein, 6.28% came from CH<sub>4</sub> reduction and 4.31% from N production savings (Table 4). The GHGI of rice production ranged from 1.20 (RN240) to 1.61 (RN0) kg CO<sub>2</sub> eq kg<sup>-1</sup>, which is higher than previous estimation of 0.24–0.74 kg CO<sub>2</sub> eq kg<sup>-1</sup> for rice production in other rice-upland crop rotation systems (Qin et al., 2010; Ma et al., 2013). Moreover, the GHGI of current rice production in the TLR (RW300) was estimated to be 1.45 times that of the national average value estimated by Wang et al. (2014a), at 1.38 versus 0.95 kg CO<sub>2</sub> eq kg<sup>-1</sup>.

Such phenomenon was attributed to the following reasons. First, compared to above studies, current higher amounts of direct straw incorporation (2.9–6.2 Mg dry matter ha<sup>-1</sup>), before rice transplantation in the TLR, triggered substantial CH<sub>4</sub> emissions (290–335 kg CH<sub>4</sub> ha<sup>-1</sup>). Crop residue incorporation is regarded as a win-win strategy to benefit food security and mitigate climate change, due to the fact that it possesses a large potential for carbon sequestration (Lu et al.,

带格式的: 字体: 11 磅



2009). However, the GWP of straw-induced CH<sub>4</sub> emissions was reported to be 3.2–3.9 times that of the straw-induced SOCSR, which indicates direct straw incorporation in paddy soils worsens rather than mitigates climate changes, in terms of GWP (Xia et al., 2014). The SOC sequestration induced by straw incorporation only offset the positive GWP by 5.2–6.2% in this study. Sensible methods of straw incorporation should therefore be developed to reduce the substantial CH<sub>4</sub> emissions without compromising the build-up of SOC stock in the TLR.

Second, the high N application rate (300kg N ha<sup>-1</sup>) in the TLR combined with the large emission factor of N fertilizer ~~manufactureproduction~~, 8.3 kg CO<sub>2</sub>-eq kg<sup>-1</sup> N (Zhang et al., 2013), ~~promotedmarked~~ the sector of N fertilizer production ~~to-beas~~ the secondary contributor to the GHGI (Table 4), ~~while such~~; ~~this~~ sector ~~wasn't, however, was not~~ involved in above-mentioned studies. Compared to local farmer's practices (RN300), reducing the N rate by 20% (RN240) lowered the GHGI by 13%, under the condition of straw incorporation, although this effect was not statistically significant (Table 4). Compared to RN240, however, further reduction of N rate (RN180 or RN120) increased the GHGI, ~~largely~~ due to the fact that rice yield was considerably ~~underminedreduced~~ under excessive N reduction. Therefore, the joint application of reasonable N reduction and judicious method of straw incorporation would be promising in reducing the GHGI for rice production in the TLR, in consideration of the current situation of simultaneous high inputs of N fertilizer and wheat straw.

### **3.4 Various Nr losses and NrI**

The results of the meta-analysis indicated that N<sub>2</sub>O emissions, as well as N leaching and runoff, ~~increaseincreased~~ exponentially with an increase in N application rate (Fig.4b-d,  $P < 0.01$ ), while the response of NH<sub>3</sub> volatilization to N rates fitted the linear model best (Fig.4a,  $P < 0.01$ ).

带格式的: 字体: 11 磅

Established models can explain the variation in the estimation of various Nr losses by 50–57%.

The estimated total Nr losses for all treatments varied from 39.3 to 91.7 kg N ha<sup>-1</sup> in the fertilization treatments (Table 5), accounting for 30.1–32.8% of N application rates. NH<sub>3</sub> volatilization dominated the NrI, with the proportion ranging from 53.5% to 57.4%, mainly because of the current fertilizer application method (soil surface ~~broadcasting~~broadcast) and high temperatures in the field (Zhao et al., 2012b; Li et al., 2014). N runoff was the second most important contributor, ~~with the proportion ranging from 25.9% to 29.7%~~ (Table 5). Using <sup>15</sup>N micro-plots combined with three-year field measurements, Zhao et al. (2012b) reported that the total Nr ~~losses~~ from rice production in the TLR, under an N rate of 300 kg N ha<sup>-1</sup>, ~~was~~were 98 kg N ha<sup>-1</sup>, which is comparable with our estimation of 91.69 kg N ha<sup>-1</sup> in the RN300 plot. Similarly, Xia and Yan (2011) estimated the Nr ~~losses~~ for life-cycle rice production in this region to be around 90 kg N ha<sup>-1</sup>. The high proportion (30.1–32.8%) of the applied N fertilizer released as Nr from rice production in the TLR, highlights the need to adopt reasonable N managements to increase the plant N uptake and reduce Nr losses (Ju et al., 2009).

The NrI of rice production in different plots varied between 2.14 g N kg<sup>-1</sup> (RN0) and 10.92 g N kg<sup>-1</sup> (RN300), which increased significantly as the N fertilizer rate increased (Table 5). The NrI for rice production in the TLR was estimated to be 10.92 g N kg<sup>-1</sup> (RN300), which is 68% higher than the national average value estimated by Chen et al. (2014), ~~largely due to the~~ as a result of higher N fertilizer ~~inputs~~input in the TLR. Under the condition of straw incorporation, reducing ~~the~~ N application rate by 20% pulled the NrI down to 8.42 g N kg<sup>-1</sup> (RN240) (Table 5). Additional N reduction could further lower the NrI, but the rice yield would be compromised largely (Table 3). Previous studies have proven that direct incorporation of crop straw ~~exert unobvious~~had

带格式的: 上标

带格式的: 上标

带格式的: 上标

insignificant effects on various Nr releases (Xia et al., 2014). Because ~~crop straws usually possess~~  
~~high values of C/N ratio and~~ the majority of N contented in the residue crop straw is not easily  
degraded by microorganisms in a short-term period ~~(Huang et al., 2004). Therefore the straw~~  
~~incorporation could promote the N contained in the residues to, and can~~ be stabilized in soil in a  
long-term period, rather than ~~directly releasing~~being released as various Nr (Huang et al., 2004;  
Xia et al., 2014). For instance, a meta-analysis, integrating 112 scientific assessments of the crop  
residue incorporation on the N<sub>2</sub>O emissions, has reported that the practice exerted no statistically  
significant effect on the N<sub>2</sub>O releases (Shan and Yan, 2013). Therefore, the effects of wheat straw  
incorporation on various Nr losses were considered as negligible in this study. ~~Although no~~  
~~specific relationship was found between the NrI and GHGI in all treatments in this study (Table 4~~  
~~and Table 5),~~  
Extra attention should be paid to the interrelationship between ~~them the~~ NrI and GHGI,  
which could provide hints for the mitigation purpose. For instance, N fertilizer production and  
application is an intermediate link between the NrI and GHGI ~~and NrI~~ (Chen et al., 2014). For the  
NrI, N fertilization promotes various Nr releases, exponentially or linearly (Fig.4), while N  
production and application made a secondary contribution to the GHGI (Table 4). Such  
interrelationships ought to be taken into account fully for any mitigation options pursued, in order  
to reduce the GHG emissions and Nr discharges from rice production simultaneously (Cui et al.,  
2013b; Cui et al., 2014).

### **3.5 Economic evaluations of GHG emissions and Nr releases and their mitigation potential**

The total environmental costs associated with the GHG emissions and Nr releases varied

带格式的: 字体颜色: 文字 1

带格式的: 字体颜色: 文字 1

带格式的: 字体: AdvPS6F00, 10 磅,  
字体颜色: 红色

带格式的: 字体: 11 磅

from 1214 ¥ ha<sup>-1</sup> for the RN0 to 2399 ¥ ha<sup>-1</sup> for the RN300, which approximately accounted for 10.44–13.47% of the farmer's income and 27.05–32.47% of the input costs, respectively (Table 6). CH<sub>4</sub> emission and NH<sub>3</sub> volatilization were the dominant contributors to the total environmental costs, respectively (Table 4 and Fig.5). The total damage costs to environment accounted for 13.5% of farmer's income under the current rice production in the TLR (RN300). Cutting the N rate from 300 to 240 kg N ha<sup>-1</sup> slightly improved the farmer's income by 3.64%, while further N reduction would ~~undermine~~reduce the economic return of farmer's (Table 6).

GHG and Nr releases from rice production in the TLR are expected to possess a large potential for mitigation, due to the current situation of direct straw incorporation and higher N fertilizer inputs. Compared to traditional practice, a reduction of N application rate from 300 to 240 kg N ha<sup>-1</sup> could alleviate 12.52% for GHGI (Table 4), 22.94% for NrI (Table 5), and 15.76% for environmental costs (Table 6). Further reduction in GHG and Nr releases (especially for CH<sub>4</sub> emissions and NH<sub>3</sub> volatilization) is possible, with the implementation of knowledge-based managements (Chen et al., 2014; Nayak et al., 2015). For the mitigation of Nr releases, switching the N fertilizer application method from surface ~~broadcasting~~broadcast to deep incorporation could largely lower the NH<sub>3</sub> volatilization from paddy soils (Zhang et al., 2012; Li et al., 2014). Moreover, other optimum N managements, such as applying controlled-release fertilizers and ~~nitrification or~~ urease inhibitors, could also effectively increase the NUE and reducing the overall Nr losses (Chen et al., 2014). For the mitigation of GHG emissions, rather than being directly incorporated before rice transplantation, crop residues should be preferentially decomposed under aerobic conditions or used to produce biochar through pyrolysis, which could effectively reduce CH<sub>4</sub> emissions (Linguist et al., ~~2012b~~2012; Xie et al., 2013). Moreover, these pre-treatments are

---

also beneficial for carbon sequestration and ~~food security~~yield production (Woolf et al., 2010; Linqvist et al., ~~2012b~~2012).

Most previous studies have merely focused on the quantification of GHG and Nr releases from food production from the perspective of environment assessments (Zhao et al., 2012b; Ma et al., 2013; Zhao et al., 2015). The perspective of economic evaluation is seldom implemented, which goes against encouraging farmer to participate in the abatement of GHG and Nr releases on their own initiative (Xia et al., 2014). The current pattern of rice production in the TLR incurs great costs to the environment, which accounted for 13.47% of the net economic return that farmer ultimately acquire (Table 6). Such an evaluation facilitates the translation of highly specialized scientific conclusions into monetary-based information that is more familiar and accessible for ~~farmer~~farmers, and therefore likely encouraging them to adopt eco-friendly agricultural managements (Wang et al., 2014b). Profitability is generally considered the main driver for farmer to change their management approach. Compared to traditional N application rate, a reduction of 20% would make environmental costs savings of 14%, whilst simultaneously improving the economic return of farmer's by 648 ¥ ha<sup>-1</sup> (Table 6). This represents an incentive for ~~farmer~~farmers to optimize their N fertilizer application rates, provided that such information is available to them.

Considering the fact that no specific carbon- and Nr-mitigation incentive programs, like the 'Carbon Farming Initiative' in Australia (Lam et al., 2013), ~~has~~have been launched in China, an ecological compensation incentive mechanism ~~(national subsidy program)~~ should be established by governments. ~~This~~This should be a national subsidy program with a special compensation and award fund to cover the extra mitigation costs induced by the adoption of knowledge-based

mitigation managements for farmers (Xia et al., 2016). Such a program would provide ~~farmer~~farmers with a tangible incentive, thus guiding them towards gradually adopting ~~knowledge-based~~the mitigation managements, ~~that~~which could effectively curb GHG emissions and Nr losses, but likely exert little positive effects on improving ~~farmer's~~their net economic return (Xia et al., 2014). Examples include the composing of crop straws aerobically, or their use to produce biochar before incorporation (Xie et al., 2013), and encouraging the application of deep placement of N fertilizer (Wang et al., 2014b), as well as the application of enhanced-efficiency N fertilizers during the rice-growing season (Akiyama et al., 2010).

#### 4 Conclusions

Our results demonstrated that producing ~~per-unit-of~~ rice yield in the TLR released ~~highersubstantial~~ GHG and Nr ~~in the TLR, than that in other rice upland cropping systems~~, which largely attributed to the current ~~situation-of~~ direct straw incorporation and excessive ~~nitrogen~~N fertilizer inputs. CH<sub>4</sub> emissions and NH<sub>3</sub> volatilization dominated the GHG and Nr releases, respectively. Reducing ~~the~~ N application rate by 20% from the tradition level (300 kg N ha<sup>-1</sup>) could effectively decrease the GHG emissions, Nr releases and the damage costs to the environment, while increased the rice yield and improved farmer's income ~~as well as simultaneously~~. Agricultural managements, such as making straw decompose aerobically before its incorporation and optimizing the application method of N fertilizer, ~~could~~showed large potentials to further reduce the GHG (e.g., CH<sub>4</sub> emission) and Nr releases (~~especially CH<sub>4</sub> emissions and~~e.g., NH<sub>3</sub> volatilization) from rice production in ~~the TLR~~this region. Further studies are needed to evaluate the comprehensive effects of these managements on GHG emissions, Nr releases and farmer's economic returns.

带格式的: 字体: 11 磅

---

## Acknowledgements

This study was financially supported by the CAS Strategic Priority Research Program (Grant No. XDA05020200) and the National Science and Technology Pillar Program (2013BAD11B00). We gratefully acknowledge the technical assistance provided by the Changshu Agroecological Experimental Station of the Chinese Academy of Sciences.

## Supplementary material

Supplementary material (Appendix A) associated with this article can be found, in the online version.

## References

- Akiyama, H., Yan, X., Yagi, K.: Evaluation of effectiveness of enhanced-efficiency fertilizers as mitigation options for N<sub>2</sub>O and NO emissions from agricultural soils: meta-analysis, *Global Change Biol.*, 16, 1837-1846, 2010.
- Banger, K., Tian, H., Lu, C.: Do nitrogen fertilizers stimulate or inhibit methane emissions from rice fields, *Global Change Biol.*, 18, 3259-3267, 2012.
- Breiling, M., Hoshino, T., Matsushashi, R.: Contributions of Rice Production to Japanese Greenhouse Gas Emissions applying Life Cycle Assessment as a Methodology. Tokyo, Laboratory for Land Resource Sciences, Department of Biological and Environmental Engineering, Graduate School for Agriculture and Life Sciences, The University of Tokyo 32, 1999.
- Chen, X., Cui, Z., Fan, M., Vitousek, P., Zhao, M., Ma, W., Wang, Z., Zhang, W., Yan, X., Yang, J.: Producing more grain with lower environmental costs, *Nature*, 514, 486-489, 2014.
- Cheng, K., Yan, M., Nayak, D., Pan, G., Smith, P., Zheng, J., Zheng, J.: Carbon footprint of crop

带格式的: 字体: 11 磅

带格式的: 字体: 11 磅

带格式的: 字体: 11 磅

---

507 production in China: an analysis of National Statistics data, J. Agr. Sci., 153, 422-431,  
508 2014.

509 Cui, Z., Yue, S., Wang, G., Meng, Q., Wu, L., Yang, Z., Zhang, Q., Li, S., Zhang, F., Chen, X.:  
510 Closing the yield gap could reduce projected greenhouse gas emissions: a case study of  
511 maize production in China, Global Change Biol., 19, 2467-2477, 2013a.

512 Cui, Z., Yue, S., Wang, G., Zhang, F., Chen, X.: In-season root-zone N management for mitigating  
513 greenhouse gas emission and reactive N losses in intensive wheat production, Environ. Sci.  
514 Technol., 47, 6015-6022, 2013b.

515 Cui, Z., Wang, G., Yue, S., Wu, L., Zhang, W., Zhang, F., Chen, X.: Closing the N-use efficiency  
516 gap to achieve food and environmental security, Environ. Sci. Technol., 48, 5780-5787,  
517 2014.

518 Galloway, J.N., Townsend, A.R., Erisman, J.W., Bekunda, M., Cai, Z., Freney, J.R., Martinelli,  
519 L.A., Seitzinger, S.P., Sutton, M.A.: Transformation of the nitrogen cycle: recent trends,  
520 questions, and potential solutions, Science, 320, 889-892, 2008.

521 Grassini, P., Cassman, K.G.: High-yield maize with large net energy yield and small global  
522 warming intensity, Proc. Natl. Acad. Sci. U.S.A., 109, 1074-1079, 2012.

523 Gu, B., Ge, Y., Ren, Y., Xu, B., Luo, W., Jiang, H., Gu, B., Chang, J.: Atmospheric reactive  
524 nitrogen in China: Sources, recent trends, and damage costs, Environ. Sci. Technol., 46,  
525 9420-9427, 2012.

526 Huang, T., Gao, B., Christie, P., Ju, X.: Net global warming potential and greenhouse gas intensity  
527 in a double-cropping cereal rotation as affected by nitrogen and straw management,  
528 Biogeosciences, 10, 13191-13229, 2013~~Y., Zou, J., Zheng, X., Wang, Y., Xu, X.: Nitrous~~



oxide emissions as influenced by amendment of plant residues with different C: N ratios,  
Soil Biol. Biochem., 36, 973-981, 2004.

Huang, Y., Zou, J., Zheng, X., Wang, Y., Xu, X.: Nitrous oxide emissions as influenced by  
amendment of plant residues with different C: N ratios, Soil Biol. Biochem., 36, 973-981,  
2004

Huang, Y., Sun, W.: Changes in topsoil organic carbon of croplands in mainland China  
over the last two decades, Chinese Sci. Bull., 51, 1785-1803, 2006.

.

Ju, X., Xing, G., Chen, X., Zhang, S., Zhang, L., Liu, X., Cui, Z., Yin, B., Christie, P., Zhu, Z.:  
Reducing environmental risk by improving N management in intensive Chinese  
agricultural systems, Proc. Natl. Acad. Sci. U.S.A., 106, 3041-3046, 2009.

Lam, S.K., Chen, D., Mosier, A.R., Roush, R.: The potential for carbon sequestration in Australian  
agricultural soils is technically and economically limited, Sci. Rep., 3, 2013.

Li, X., Xia, L., Yan, X.: Application of membrane inlet mass spectrometry to directly quantify  
denitrification in flooded rice paddy soil, Biol. Fertil. Soils, 50, 891-900, 2014.

Liang L.: Environmental impact assessment of circular agriculture based on life cycle  
assessment: Methods and case studies, PhD thesis, China Agricultural University, 2009 (in  
Chinese with an English abstract).

Liao, Q., Zhang, X., Li, Z., Pan, G.X., Smith, P., Jin, Y., Wu, X.: Increase in soil organic carbon  
stock over the last two decades in China's Jiangsu Province, Global Change Biol., 15,  
861-875, 2009.

Linguist, B., Groenigen, K.J., Adviento-Borbe, M.A., Pittelkow, C., Kessel, C.: An agronomic  
assessment of greenhouse gas emissions from major cereal crops, Global Change Biol., 18,

带格式的: 字体: 五号, 字体颜色: 文字 1, 英语(英国)

带格式的: EndNote Bibliography, 缩进: 左侧: 0 厘米, 悬挂缩进: 3 字符, 首行缩进: -3 字符

带格式的: 字体颜色: 文字 1, 英语(英国)

带格式的: 字体: 五号, 字体颜色: 文字 1, 英语(英国)

带格式的: 字体颜色: 文字 1, 英语(英国)

带格式的: 字体: 五号, 字体颜色: 文字 1, 英语(英国)

带格式的: 字体颜色: 文字 1, 英语(英国)

551 ~~194-209, 2012a.~~

552 Linquist, B., Adviento-Borbe, M., Pittelkow, C., van Kessel, C., van Groenigen, K.: Fertilizer  
553 management practices and greenhouse gas emissions from rice systems: A quantitative  
554 review and analysis, *Field Crops Res.*, 135, 10-21, ~~2012b~~2012.

555 Lu, F., Wang, X., Han, B., Ouyang, Z., Duan, X., Zheng, H., Miao, H.: Soil carbon sequestrations  
556 by nitrogen fertilizer application, straw return and no-tillage in China's cropland, *Global*  
557 *Change Biol.*, 15, 281-305, 2009.

558 Ma, J., Ma, E., Xu, H., Yagi, K., Cai, Z.: Wheat straw management affects CH<sub>4</sub> and N<sub>2</sub>O  
559 emissions from rice fields, *Soil Biol. Biochem.*, 41, 1022-1028, 2009.

560 Ma, Y., Kong, X., Yang, B., Zhang, X., Yan, X., Yang, J., Xiong, Z.: Net global warming potential  
561 and greenhouse gas intensity of annual rice–wheat rotations with integrated soil-crop  
562 system management, *Agric. Ecosyst. Environ.*, 164, 209-219, 2013.

563 Mandal, B., Majumder, B., Adhya, T., Bandyopadhyay, P., Gangopadhyay, A., Sarkar, D., Kundu,  
564 M., Choudhury, S.G., Hazra, G., Kundu, S.: Potential of double-cropped rice ecology to  
565 conserve organic carbon under subtropical climate, *Global Change Biol.*, 14, 2139-2151,  
566 2008.

567 Nayak, D., Saetnan, E., Cheng, K., Wang, W., Koslowski, F., Cheng, Y., Zhu, W.Y., Wang, J., Liu,  
568 J., Moran, D.: Management opportunities to mitigate greenhouse gas emissions from  
569 Chinese agriculture, *Agric. Ecosyst. Environ.*, 209, 108-124, 2015.

570 ~~Pan, G., Li, L., Wu, L., Zhang, X.: Storage and sequestration potential of topsoil organic~~  
571 ~~carbon in China's paddy soils, *Global Change Biol.*, 10, 79–92, 2004.~~

572 Qin, Y., Liu, S., Guo, Y., Liu, Q., Zou, J.: Methane and nitrous oxide emissions from organic

带格式的: 字体颜色: 文字 1

---

573 and conventional rice cropping systems in Southeast China, *Biol. Fertil. Soils*, 46,  
574 825-834, 2010.

575 Shan, J., Yan, X.Y.: Effects of crop residue returning on nitrous oxide emissions in  
576 agricultural soils, *Atmos. Environ.*, 71, 170-175, 2013.

577 Shang, Q., Yang, X., Gao, C., Wu, P., Liu, J., Xu, Y., Shen, Q., Zou, J., Guo, S.: Net annual global  
578 warming potential and greenhouse gas intensity in Chinese double rice-cropping systems:  
579 a 3-year field measurement in long-term fertilizer experiments, *Global Change Biol.*, 17,  
580 2196-2210, 2011.

581 Singh, Y., Singh, B., Timsina, J.: Crop residue management for nutrient cycling and improving  
582 soil productivity in rice-based cropping systems in the tropics, *Adv. Agron.*, 85, 269-407,  
583 2005.

584 Wang, W., Guo, L., Li, Y., Su, M., Lin, Y., De Perthuis, C., Ju, X., Lin, E., Moran, D.: Greenhouse  
585 gas intensity of three main crops and implications for low-carbon agriculture in China,  
586 *Climatic Change*, 128, 57-70, 2014a.

587 Wang, W., Koslowski, F., Nayak, D.R., Smith, P., Saetnan, E., Ju, X., Guo, L., Han, G., de  
588 Perthuis, C., Lin, E., Moran, D.: Greenhouse gas mitigation in Chinese agriculture:  
589 Distinguishing technical and economic potentials, *Global Environ. Chang.*, 26, 53-62,  
590 2014b.

591 Woolf, D., Amonette, J.E., Street-Perrott, F.A., Lehmann, J., Joseph, S.: Sustainable biochar to  
592 mitigate global climate change, *Nat. Commun.*, 1, 56, 2010.

593 Xia, L., Wang, S., Yan, X.: Effects of long-term straw incorporation on the net global warming  
594 potential and the net economic benefit in a rice-wheat cropping system in China, *Agric.*

带格式的: 字体: 11 磅, 字体颜色: 自动设置, 英语(美国), 不检查拼写或语法

- 595 Ecosyst. Environ., 197, 118-127, 2014.
- 596 [Xia, L., Ti, C., Li, B., Xia, Y., Yan, X.: Greenhouse gas emissions and reactive nitrogen](#)  
597 [releases during the life-cycles of staple food production in China and their mitigation](#)  
598 [potential, Sci. Total Environ., 556, 116-125, 2016.](#)
- 599 [Xia, Y., Yan, X.:](#) Life-cycle evaluation of nitrogen-use in rice-farming systems: implications for  
600 economically-optimal nitrogen rates, Biogeosciences, 8, 3159-3168, 2011.
- 601 Xia, Y., Yan, X.: Ecologically optimal nitrogen application rates for rice cropping in the Taihu  
602 Lake region of China, Sustain. Sci., 7, 33-44, 2012.
- 603 Xie, B., Zheng, X., Zhou, Z., Gu, J., Zhu, B., Chen, X., Shi, Y., Wang, Y., Zhao, Z., Liu, C.:  
604 Effects of nitrogen fertilizer on CH<sub>4</sub> emission from rice fields: multi-site field observations,  
605 Plant Soil, 326, 393-401, 2010.
- 606 Xie, Z., Xu, Y., Liu, G., Liu, Q., Zhu, J., Tu, C., Amonette, J.E., Cadisch, G., Yong, J.W., Hu, S.:  
607 Impact of biochar application on nitrogen nutrition of rice, greenhouse-gas emissions and  
608 soil organic carbon dynamics in two paddy soils of China, Plant Soil, 370, 527-540, 2013.
- 609 Yan, X., Akiyama, H., Yagi, K., Akimoto, H.: Global estimations of the inventory and mitigation  
610 potential of methane emissions from rice cultivation conducted using the 2006  
611 Intergovernmental Panel on Climate Change Guidelines, Global Biogeochem. Cycles, 23,  
612 2009.
- 613 Yan, X., [Cai, Z., Wang, S., Smith, P.: Direct measurement of soil organic carbon content change in](#)  
614 [the croplands of China, Global Change Biol., 17, 1487-1496, 2013.](#)
- 615 [Yan, X.,](#) Ti, C., Vitousek, P., Chen, D., Leip, A., Cai, Z., Zhu, Z.: Fertilizer nitrogen recovery  
616 efficiencies in crop production systems of China with and without consideration of the

---

617 residual effect of nitrogen, *Environ. Res. Lett.*, 9, 095002, 2014.

618 Yao, Z., Zheng, X., Dong, H., Wang, R., Mei, B., Zhu, J.: A 3-year record of N<sub>2</sub>O and CH<sub>4</sub>

619 emissions from a sandy loam paddy during rice seasons as affected by different nitrogen

620 application rates, *Agric. Ecosyst. Environ.*, 152, 1-9, 2013.

621 Zhang, F., Cui, Z., Chen, X., Ju, X., Shen, J., Chen, Q., Liu, X., Zhang, W., Mi, G., Fan, M.:

622 Integrated nutrient management for food security and environmental quality in China, *Adv.*

623 *Agron.*, 116, 1-40, 2012.

624 Zhang, W., Dou, Z., He, P., Ju, X., Powlson, D., Chadwick, D., Norse, D., Lu, Y., Zhang, Y., Wu,

625 L.: New technologies reduce greenhouse gas emissions from nitrogenous fertilizer in

626 China, *Proc. Natl. Acad. Sci. U.S.A.*, 110, 8375-8380, 2013.

627 Zhao, M., Tian, Y., Ma, Y., Zhang, M., Yao, Y., Xiong, Z., Yin, B., Zhu, Z.: Mitigating gaseous

628 nitrogen emissions intensity from a Chinese rice cropping system through an improved

629 management practice aimed to close the yield gap, *Agric. Ecosyst. Environ.*, 203, 36-45,

630 2015.

631 Zhao, X., Zhou, Y., Min, J., Wang, S., Shi, W., Xing, G.: Nitrogen runoff dominates water nitrogen

632 pollution from rice-wheat rotation in the Taihu Lake region of China, *Agric. Ecosyst.*

633 *Environ.*, 156, 1-11, 2012a.

634 Zhao, X., Zhou, Y., Wang, S., Xing, G., Shi, W., Xu, R., Zhu, Z.: Nitrogen balance in a highly

635 fertilized rice-wheat double-cropping system in southern China, *Soil Sci. Soc. Am. J.*, 76,

636 1068-1078, 2012b.

637 [Zhao, X., Liu, S.L., Pu, C., Zhang, X.Q., Xue, J.F., Zhang, R., Wang, Y.Q., Lal, R., Zhang, H.L.,](#)

638 [Chen, F.:Methane and nitrous oxide emissions under no-till farming in China: a](#)

meta-analysis, *Global Change Biol.* **22**, 1372-1384, 2015a.

Zhao, X., Zhang, R., Xue, J.F., Pu, C., Zhang, X.Q., Liu, S.L., Chen, F., Lal, R., Zhang, H.L.:  
 Management-induced changes to soil organic carbon in China: A meta-analysis. *Adv.  
 Agron.*, **134**, 1-49, 2015b.

Zou, J., Huang, Y., Jiang, J., Zheng, X., Sass, R.L.: A 3-year field measurement of methane and  
 nitrous oxide emissions from rice paddies in China: Effects of water regime, crop residue,  
 and fertilizer application, *Global Biogeochem. Cycles*, **19**, 2005.

带格式的: 字体颜色: 文字 1, 不检查拼写或语法

**Table 1.** Field experimental treatments and agricultural management practices during the  
 rice-growing seasons of 2013 and 2014 in the ~~TLR~~Taihu Lake region.

| Treatment <sup>a</sup> | RN0     | RN120     | RN180     | RN240     | RN300     |
|------------------------|---------|-----------|-----------|-----------|-----------|
| Chemical fertilizer    | 0:30:60 | 120:30:60 | 180:30:60 | 240:30:60 | 300:30:60 |

带格式的: 缩进: 左侧: 0 厘米, 首行缩进: 0 字符

带格式的: 字体: 五号, 检查拼写和语法

带格式的: 字体: 五号

|                                                                           |                        |           |           |           |           |
|---------------------------------------------------------------------------|------------------------|-----------|-----------|-----------|-----------|
| application rate                                                          |                        |           |           |           |           |
| (N:P <sub>2</sub> O <sub>5</sub> :K <sub>2</sub> O, kg ha <sup>-1</sup> ) |                        |           |           |           |           |
| Split N application ratio                                                 | ---                    | 4:3:3     | 4:3:3     | 4:3:3     | 4:3:3     |
| Straw application rate                                                    | 3.94/2.88 <sup>b</sup> | 4.49/4.65 | 4.93/5.18 | 5.33/5.87 | 5.81/6.17 |
| (Mg dry matter ha <sup>-1</sup> )                                         |                        |           |           |           |           |
| Water regime <sup>c</sup>                                                 | F-D-F-M                | F-D-F-M   | F-D-F-M   | F-D-F-M   | F-D-F-M   |
| Density (10 <sup>4</sup> plants ha <sup>-1</sup> )                        | 2.5                    | 2.5       | 2.5       | 2.5       | 2.5       |

<sup>a</sup>RN0, RN120, RN180, RN240 and RN300 represent ~~nitrogen~~N application rates of 0, 120, 180, 240, 300 kg N ha<sup>-1</sup>, respectively.

<sup>b</sup>3.94/2.88 denote that straw application rates during the rice-growing seasons of 2013 and 2014 are 3.94 and 2.88 Mg dry matter ha<sup>-1</sup>, respectively.

<sup>c</sup>F, flooding; D, midseason drainage; M, moist but non-waterlogged by intermittent irrigation.

**Table 2.** Two-way ANOVA for the effects of fertilizer (F) application and year (Y) on CH<sub>4</sub> and N<sub>2</sub>O emissions, and rice grain yields in rice paddies.

| Factor | df | CH <sub>4</sub> (kg ha <sup>-1</sup> ) |   |   | N <sub>2</sub> O (kg N ha <sup>-1</sup> ) |   |   | Yield (kg ha <sup>-1</sup> ) |   |   |
|--------|----|----------------------------------------|---|---|-------------------------------------------|---|---|------------------------------|---|---|
|        |    | SS                                     | F | P | SS                                        | F | P | SS                           | F | P |

|       |    |       |      |      |      |       |        |          |       |        |
|-------|----|-------|------|------|------|-------|--------|----------|-------|--------|
| F     | 4  | 8739  | 0.79 | 0.55 | 0.33 | 12.46 | < 0.01 | 39297547 | 32.96 | < 0.01 |
| Y     | 1  | 4492  | 1.62 | 0.22 | 0.11 | 16.41 | < 0.01 | 2810414  | 9.43  | < 0.01 |
| F×Y   | 4  | 2532  | 0.23 | 0.92 | 0.18 | 7.1   | < 0.01 | 750639   | 0.63  | 0.65   |
| Model | 9  | 15763 | 0.63 | 0.77 | 0.62 | 10.52 | < 0.01 | 42858600 | 15.97 | < 0.01 |
| Error | 16 | 20    |      |      | 0.13 |       |        | 5962260  |       |        |

**Table 3.** Rice yield and **nitrogen use efficiency (NUE)** for the two rice-growing seasons from 2013 to 2014 in the **TLR Taihu Lake region**.

| Year | Treatment <sup>a</sup> | Yield (kg ha <sup>-1</sup> ) | NUE (%) |
|------|------------------------|------------------------------|---------|
| 2013 | RN0                    | 4829 ± 207                   | ---     |
|      | RN120                  | 7079 ± 645                   | 23.40   |

带格式的：字体：五号，检查拼写和语法

带格式的：字体：五号，检查拼写和语法

带格式的：字体：五号，检查拼写和语法

带格式的：字体：五号



|                  |       |                          |       |
|------------------|-------|--------------------------|-------|
|                  | RN180 | 7655 ± 601               | 28.12 |
|                  | RN240 | 8273 ± 569               | 33.61 |
|                  | RN300 | 8029 ± 101               | 30.63 |
| 2014             | RN0   | 5919 ± 131               | ---   |
|                  | RN120 | 7598 ± 1077              | 23.86 |
|                  | RN180 | 7768 ± 570               | 21.19 |
|                  | RN240 | 8880 ± 435               | 35.54 |
|                  | RN300 | 8761 ± 369               | 32.07 |
| Two-year average | RN0   | 5374 ± 617d <sup>b</sup> | ---   |
|                  | RN120 | 7339 ± 843c              | 23.63 |
|                  | RN180 | 7711 ± 527bc             | 24.66 |
|                  | RN240 | 8576 ± 562a              | 34.58 |
|                  | RN300 | 8395 ± 468ab             | 31.35 |

686 <sup>a</sup>Definitions of the treatment codes are given in the footnotes of Table 1.

687 <sup>b</sup>Mean±SD; different letters within the same column indicate a significant difference at  $p<0.05$ .

**Table 4.** The net global warming potential (NGWP) and greenhouse gas intensity (GHGI) for the two rice-growing seasons from 2013 to 2014 in the TLR Taihu

Lake region

| Year | Treatment <sup>a</sup> | CH <sub>4</sub> emission            | N <sub>2</sub> O emission | SOCSR                                  | Irrigation | N fertilizer<br>production | Others | NGWP  | GHGI                                   |
|------|------------------------|-------------------------------------|---------------------------|----------------------------------------|------------|----------------------------|--------|-------|----------------------------------------|
|      |                        | kg CH <sub>4</sub> ha <sup>-1</sup> | kg N ha <sup>-1</sup>     | kg C ha <sup>-1</sup> yr <sup>-1</sup> |            |                            |        |       | kg CO <sub>2</sub> eq kg <sup>-1</sup> |
|      |                        |                                     |                           |                                        |            |                            |        |       |                                        |
| 2013 | RN0                    | 306.07 ± 41 <sup>b</sup>            | 0.08 ± 0.01               | 129.58                                 | 1170       | 0                          | 217    | 8601  | 1.78                                   |
|      | RN120                  | 317.26 ± 92                         | 0.10 ± 0.01               | 154.07                                 | 1170       | 996                        | 265    | 9845  | 1.39                                   |
|      | RN180                  | 287.8 ± 12                          | 0.13 ± 0.01               | 171.54                                 | 1170       | 1494                       | 277    | 9568  | 1.25                                   |
|      | RN240                  | 273.27 ± 36                         | 0.14 ± 0.06               | 185.50                                 | 1170       | 1992                       | 291    | 9670  | 1.17                                   |
|      | RN300                  | 305.13 ± 90                         | 0.16 ± 0.03               | 196.87                                 | 1170       | 2490                       | 285    | 10927 | 1.36                                   |
| 2014 | RN0                    | 307.22 ± 47                         | 0.02 ± 0.05               | 129.58                                 | 1256       | 0                          | 240    | 8711  | 1.47                                   |
|      | RN120                  | 351.96 ± 28                         | 0.09 ± 0.02               | 154.07                                 | 1256       | 996                        | 276    | 10805 | 1.42                                   |

带格式的: 字体: 五号, 检查拼写和语法

带格式的: 字体: 五号

|          |       |              |               |          |      |      |     |       |               |
|----------|-------|--------------|---------------|----------|------|------|-----|-------|---------------|
|          | RN180 | 291.25 ± 18  | 0.24 ± 0.04   | 171.54   | 1256 | 1494 | 280 | 9795  | 1.26          |
|          | RN240 | 317.65 ± 28  | 0.34 ± 0.12   | 185.50   | 1256 | 1992 | 303 | 10972 | 1.24          |
|          | RN300 | 343.8 ± 61   | 0.53 ± 0.21   | 196.87   | 1256 | 2490 | 301 | 12169 | 1.39          |
| Two-year | RN0   | 306.65 ± 39a | 0.05 ± 0.05b  | 129.58c  | 1213 | 0    | 229 | 8656  | 1.61 ± 0.25a  |
| average  | RN120 | 334.61 ± 64a | 0.09 ± 0.02b  | 154.07bc | 1213 | 996  | 271 | 10322 | 1.40 ± 0.16b  |
|          | RN180 | 289.53 ± 14a | 0.18 ± 0.07ab | 171.54ab | 1213 | 1494 | 279 | 9679  | 1.25 ± 0.09bc |
|          | RN240 | 295.46 ± 38a | 0.24 ± 0.14ab | 185.50ab | 1213 | 1992 | 297 | 10321 | 1.20 ± 0.08cd |
|          | RN300 | 324.47 ± 72a | 0.35 ± 0.25a  | 196.87a  | 1213 | 2490 | 293 | 11550 | 1.38 ± 0.21bc |

<sup>a</sup>Definitions of treatment codes are given in the footnotes of Table 1.

<sup>b</sup>Mean ± SD; different letters within same column indicate a significant difference at  $p < 0.05$ .

**Table 5.** The seasonal average ~~various reactive N (Nr)~~ losses and ~~reactive N intensity (NrI)~~ for the two rice-growing seasons from 2013 to 2014 in the ~~TLR~~Taihu Lake region

| Treatment <sup>a</sup> | NH <sub>3</sub><br>volatilization | N<br>runoff | N<br>leaching | N <sub>2</sub> O<br>emission | NO <sub>x</sub><br>emission | Total Nr<br>losses | NrI                  |
|------------------------|-----------------------------------|-------------|---------------|------------------------------|-----------------------------|--------------------|----------------------|
|                        | kg N ha <sup>-1</sup>             |             |               |                              |                             |                    | g N kg <sup>-1</sup> |
| RN0                    | 0.64                              | 5.39        | 1.44          | 0.07                         | 3.96                        | 11.50              | 2.14                 |
| RN120                  | 21.04                             | 10.30       | 2.24          | 0.12                         | 5.62                        | 39.32              | 5.36                 |
| RN180                  | 31.24                             | 14.25       | 2.80          | 0.21                         | 6.44                        | 54.93              | 7.12                 |
| RN240                  | 41.44                             | 19.70       | 3.50          | 0.27                         | 7.26                        | 72.17              | 8.42                 |
| RN300                  | 51.64                             | 27.24       | 4.37          | 0.38                         | 8.07                        | 91.69              | 10.92                |

<sup>a</sup>Definitions of treatment codes are given in the footnotes of Table 1.

带格式的: 字体: 五号, 检查拼写和语法

带格式的: 字体: 五号

带格式的: 字体: 五号

**Table 6.** The ~~seasonal average~~ economic ~~evaluation indicators (two-season average)~~ for rice production of the ~~two~~ growing seasons from 2013 to 2014 in the ~~TLR~~ Taihu Lake region (unit:  $\text{¥ ha}^{-1}$ )

| Treatment <sup>a</sup> | Yield income <sup>b</sup> | Input costs <sup>c</sup> | Farmer's income <sup>d</sup> | Environmental costs <sup>e</sup> |             |
|------------------------|---------------------------|--------------------------|------------------------------|----------------------------------|-------------|
|                        |                           |                          |                              | GHG emissions                    | Nr releases |
| RN0                    | 16125                     | 4493                     | 11632                        | 1143                             | 71          |
| RN120                  | 22020                     | 6104                     | 15916                        | 1363                             | 376         |
| RN180                  | 23130                     | 6542                     | 16588                        | 1278                             | 535         |
| RN240                  | 25725                     | 7277                     | 18448                        | 1362                             | 700         |
| RN300                  | 25185                     | 7385                     | 17800                        | 1525                             | 874         |

<sup>a</sup>Definitions of treatment codes are given in the footnotes of Table 1.

<sup>b</sup>Yield income = rice yield  $\times$  rice price.

<sup>c</sup>Input costs denote the economic input of purchasing various agricultural materials and hiring labours.

<sup>d</sup>Farmer's income = Yield income - ~~input~~ Input costs.

<sup>e</sup>Environmental costs denoted the sum of the acidification costs, eutrophication costs and global warming costs incurred by GHG emissions and Nr releases. The cost prices of GHG and Nr releases are as followed: GHG emission,  $132 \text{ ¥ t}^{-1} \text{ CO}_2 \text{ eq}$  (Xia et al., 2014);  $\text{NH}_3$  volatilization,  $13.12 \text{ ¥ kg}^{-1} \text{ N}$ ; N leaching,  $6.12 \text{ ¥ kg}^{-1} \text{ N}$ ; N runoff,  $3.64 \text{ ¥ kg}^{-1} \text{ N}$ ;  $\text{NO}_x$  emission,  $8.7 \text{ ¥ kg}^{-1} \text{ N}$  (Xia and Yan, 2011).

带格式的: 字体: 五号, 检查拼写和语法

带格式的: 字体: 五号

带格式的: 字体: 五号

带格式的: 字体: 五号, 字体颜色: 文字 1, 英语(英国), 检查拼写和语法

## Figure captions

Fig. 1. Seasonal variations in the daily precipitation and the temperature during the two rice-growing seasons of (a) 2013 and (b) 2014.

Fig.2. Relationship between N fertilizer application rate and ~~seasonal~~ average rice grain yield over the two rice-growing seasons of 2013 and 2014 in the ~~TLR~~ Taihu Lake region.

The vertical bars represent standard errors (~~n=6~~).

Fig.3. Seasonal variations in (a) CH<sub>4</sub> and (b) N<sub>2</sub>O fluxes during the two rice-growing seasons from 2013 to 2014 in the ~~TLR~~ Taihu Lake region. The arrow indicates N fertilizer application.

The vertical bars represent standard errors (~~n=3~~).

Fig.4. Relationship between N fertilizer application rate and (a) NH<sub>3</sub> ~~emissions~~ volatilization, (b) N runoff, (c) N leaching and (d) N<sub>2</sub>O emissions for rice production in the ~~TLR~~ Taihu Lake region. These relationships were obtained through a meta-analysis.

Fig.5. Seasonal average total environmental costs incurred by ~~greenhouse gas (GHG)~~ emissions and ~~reactive N (Nr)~~ losses for rice production in ~~TLR~~ Taihu Lake region.

带格式的: 字体: 五号, 检查拼写和语法

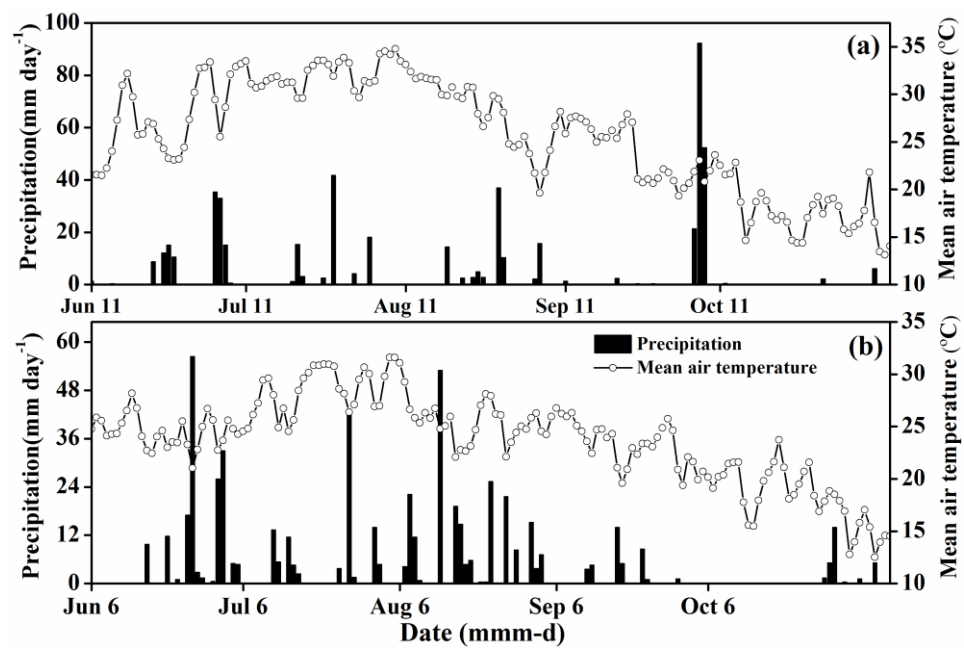

Fig.1

带格式的: 字体: 11 磅, 检查拼写和语法

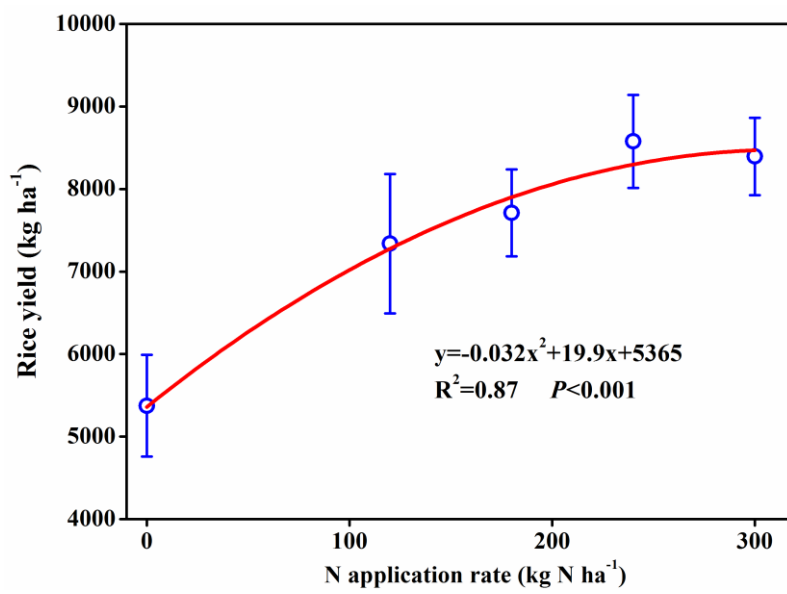

**Fig.2**

带格式的: 字体: 11 磅, 检查拼写和语法



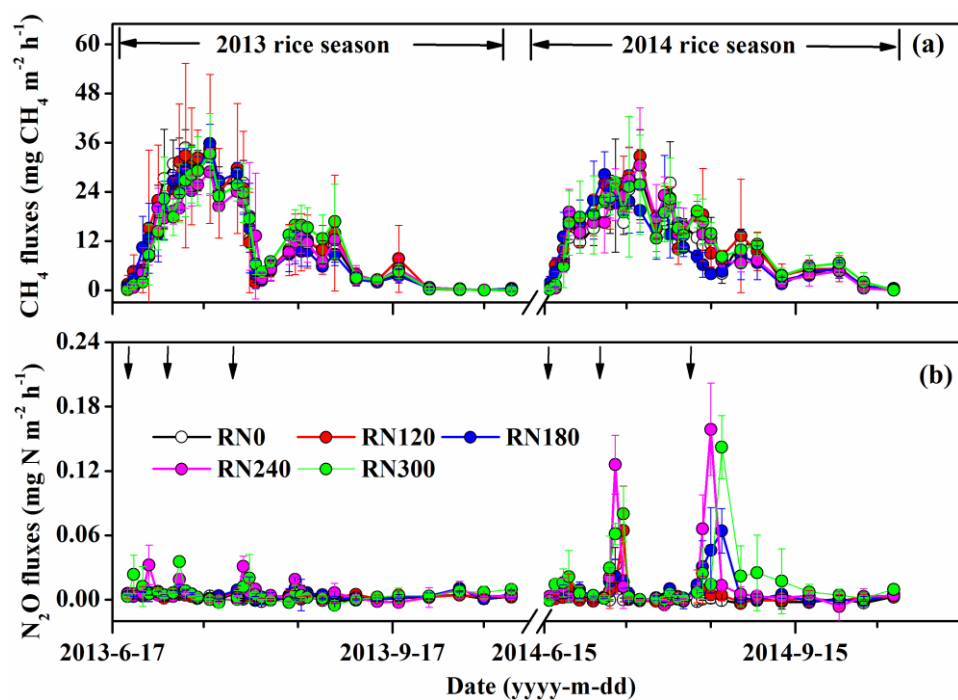

Fig.3

带格式的: 字体: 11 磅, 检查拼写和语法

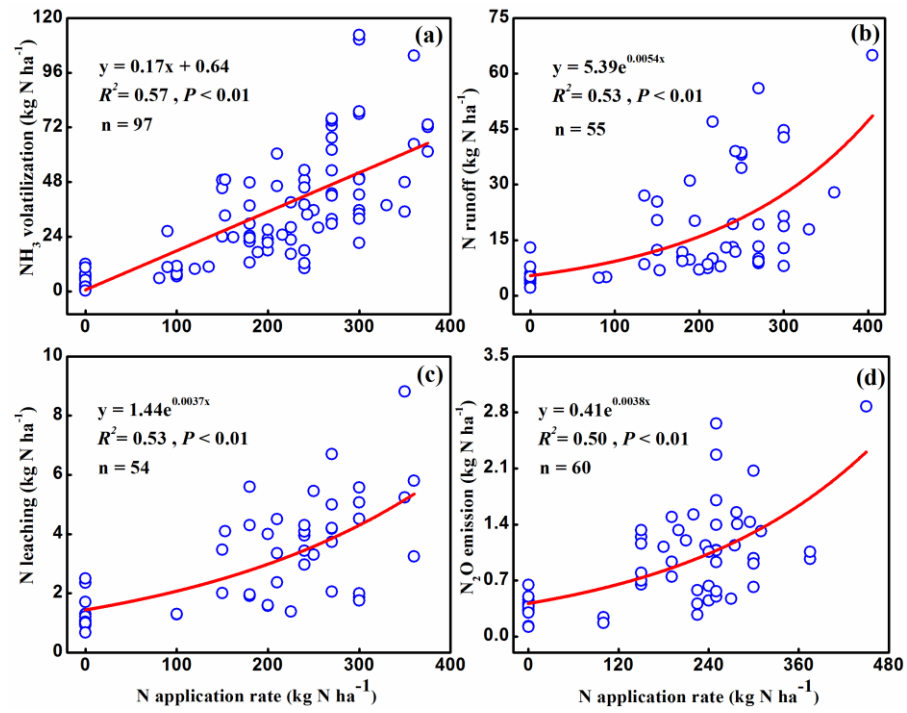

**Fig.4**

带格式的: 字体: 11 磅, 检查拼写和语法

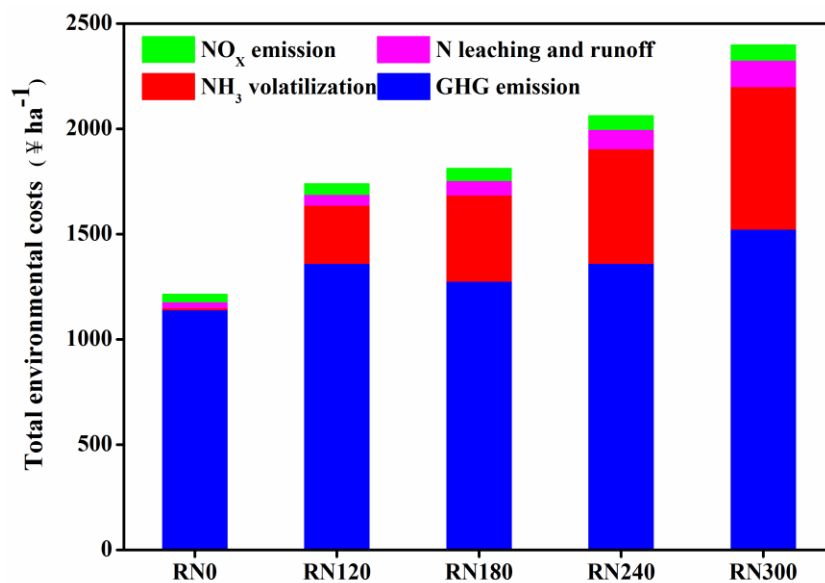

带格式的: 字体: 五号, 字体颜色: 文字 1

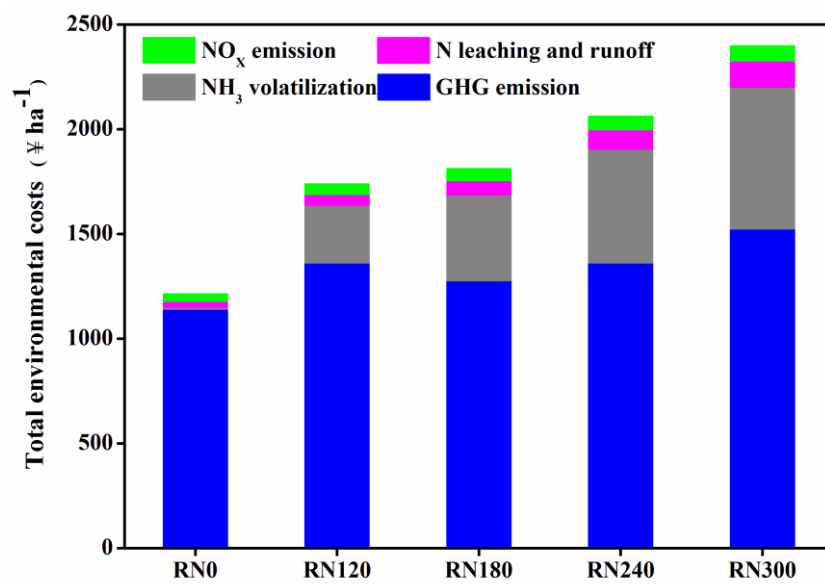

带格式的: 字体: 五号, 字体颜色: 文字 1

Fig.5

带格式的: 字体: 11 磅, 检查拼写和语法

带格式的: 字体: 11 磅, 检查拼写和语法

带格式的: 字体: 11 磅
