# Supplementary material for: Greenhouse gas emissions and reactive nitrogen releases from rice production with simultaneous incorporation of wheat straw and nitrogen fertilizer
Source: Copernicus journal article supplement (doi:10.5194/bg-2015-620), 2016-01-18
Supplement: Supplementary file [file bg-2015-620-AC11-supplement.pdf]

1 **Greenhouse gas emissions and reactive nitrogen releases from rice production with**  
2 **simultaneous incorporation of wheat straw and nitrogen fertilizer**

3 Longlong Xia<sup>a,b</sup>, Yongqiu Xia<sup>a</sup>, Shutan Ma<sup>a,b</sup>, Jinyang Wang<sup>a</sup>, Shuwei Wang<sup>a,b</sup>, Wei Zhou<sup>a,b</sup>,  
4 Xiaoyuan Yan<sup>a\*</sup>

5 <sup>a</sup>. State Key Laboratory of Soil and Sustainable Agriculture, Institute of Soil Science, Chinese  
6 Academy of Sciences, Nanjing 210008, China.

7 <sup>b</sup>. University of Chinese Academy of Sciences, Beijing 100049, China.

8

9 **\*Corresponding author:** Xiaoyuan Yan

10 State Key Laboratory of Soil and Sustainable Agriculture, Institute of Soil Science, Chinese  
11 Academy of Sciences, Nanjing 210008, P. R. China

12 Phone number: +86 025 86881530, Fax: +86 025 86881000

13 Email address: yanxy@issas.ac.cn

14

15

16

17

18

19

20

21

22

23 **Abstract**

24 Impacts of simultaneous inputs of crop straw and nitrogen (N) fertilizer on greenhouse gas  
25 (GHG) emissions and N losses from rice production are not well understood. A two-year field  
26 experiment was established in a rice-wheat cropping system in the Taihu Lake region (TLR) of  
27 China to evaluate the GHG intensity (GHGI), reactive N intensity (NrI) of rice production with  
28 inputs of wheat straw and N fertilizer. The field experiment included five treatments of different N  
29 fertilization rates for rice production: 0 (RN0), 120 (RN120), 180 (RN180), 240 (RN240) and 300  
30 kg N ha<sup>-1</sup> (RN300, traditional N applied rate in the TLR). Wheat straws were fully incorporated  
31 into soil before rice transplantation. The meta-analytic technique was employed to evaluate  
32 various Nr losses. Results showed that the response of rice yield to N rate successfully fitted a  
33 quadratic model, while N fertilization promoted Nr discharges exponentially (nitrous oxide  
34 emission, N leaching and runoff) or linearly (ammonia volatilization). The GHGI of rice  
35 production ranged from 1.20 (RN240) to 1.61 (RN0) kg CO<sub>2</sub> equivalent (CO<sub>2</sub> eq) kg<sup>-1</sup>, while NrI  
36 varied from 2.14 (RN0) to 10.92 (RN300) g N kg<sup>-1</sup>. Methane (CH<sub>4</sub>) emission dominated the  
37 GHGI with proportion of 70.2–88.6% due to direct straw incorporation, while ammonia (NH<sub>3</sub>)  
38 volatilization dominated the NrI with proportion of 53.5–57.4%. Damage costs to environment  
39 incurred by GHG and Nr releases from current rice production (RN300) accounted for 8.8% and  
40 4.9% of farmers' incomes, respectively. Cutting N application rate from 300 (traditional N rate) to  
41 240 kg N ha<sup>-1</sup> could improve rice yield and nitrogen use efficiency by 2.14% and 10.30%,  
42 respectively, whilst simultaneously reduced GHGI by 13%, NrI by 23% and total environmental  
43 costs by 16%. Moreover, the reduction of 60 kg N ha<sup>-1</sup> improved farmers' income by 639 ¥ ha<sup>-1</sup>,  
44 which would provide them with an incentive to change the current N application rate. Our study

45 suggests that GHG and Nr releases, especially for CH<sub>4</sub> emission and NH<sub>3</sub> volatilization, from rice  
46 production in the TLR could be further reduced, considering the current incorporation pattern of  
47 wheat straw and N fertilizer.

48 **Key words:** Taihu Lake region, greenhouse gas intensity, Nr intensity, rice production, straw  
49 incorporation

50

51

52

53

54

55

56

57

58

59

60

61

62

63

64

65

66

## 67 **1 Introduction**

68 Rice is the staple food for the majority of the world's population. However, while  
69 industriously feeding the global population, rice production is an important source of greenhouse  
70 gas (GHG) emissions and reactive nitrogen (Nr) releases (Yan et al., 2009; Chen et al., 2014).  
71 Rice production in China involves heavy methane (CH<sub>4</sub>) emissions due to the water regime  
72 managements (e.g., continuous flooding in some regions) and straw incorporation practices (e.g.,  
73 direct incorporation without any pretreatments) (Yan et al., 2009). Besides, lower nitrogen use  
74 efficiency for rice cultivation in China (approximately 31%) aggravates the release of various Nr  
75 species, thus threatening ecosystem functions (Galloway et al., 2008; Zhang et al., 2012). Such a  
76 dilemma highlights the need for the simultaneous evaluation of GHG emissions and Nr losses for  
77 rice production in China. Rice cultivation in intensive agricultural regions, characterized by high  
78 inputs of N fertilizer and crop residues, should be prioritized for the implementation of such  
79 evaluation (Ju et al., 2009; Chen et al., 2014).

80 Taihu Lake region (TLR) is one of the most productive areas for rice production in China,  
81 largely owing to the popularity of intensive cultivation (Zhao et al., 2012a; Zhao et al., 2012b).  
82 Currently, rice yield of this region in some fields can reach up to 8000 kg ha<sup>-1</sup> or even higher (Ma  
83 et al., 2013; Zhao et al., 2015). However, these grain yields are achieved with a cost to  
84 environment (Ju et al., 2009). TLR generally receives 550–600 kg N ha<sup>-1</sup> yr<sup>-1</sup>, with the  
85 rice-growing season accounting for nearly 300 kg N ha<sup>-1</sup> (Zhao et al., 2012b). Besides from these  
86 excessive N inputs, TLR also experiences high amounts of crop residue incorporation, which is  
87 highly encouraged by local governments (Xia et al., 2014). However, direct straw incorporation  
88 before rice transplantation triggers substantial CH<sub>4</sub> emissions (Ma et al., 2009; Ma et al., 2013).

89 Besides such substantial releases of Nr and GHG in a direct way, indirect releases during the  
90 production of various agricultural materials used for farming operations, are also not ignorable,  
91 due to higher input rates of these materials caused by intensive cultivation (Zhang et al., 2013;  
92 Cheng et al., 2014). This warrants the need for life-cycle assessment (LCA) of GHG emissions  
93 and Nr releases with respect to rice production in this region.

94 Considerable environmental costs can be caused by the direct and indirect releases of GHG  
95 and Nr from rice production in the TLR, for instance, in the form of global warming, water  
96 eutrophication, or soil acidification (Ju et al., 2009; Xia and Yan, 2011; Xia and Yan, 2012).  
97 Previous studies have proven that environmental costs assessment could provide guidance for  
98 emerging policy priorities in mitigating certain GHG or Nr species, after quantifying both their  
99 release amounts and damage costs to ecosystems (Gu et al., 2012). However, few studies have  
100 attempted to evaluate the total GHG and Nr releases and the associated environmental costs from  
101 rice production, with high inputs of N fertilizer and crop straw.

102 In the present study, we conducted two years of simultaneous measurements of CH<sub>4</sub> and  
103 nitrous oxide (N<sub>2</sub>O) emissions from a rice-wheat cropping system in the TLR to evaluate the  
104 impacts of simultaneous inputs of crop straw and N fertilizer on (1) net global warming potential  
105 (NGWP) and GHG intensity (GHGI), (2) total Nr losses and Nr intensity (NrI), (3) environmental  
106 costs incurred by these GHG and Nr releases associated with rice production, from the perspective  
107 of LCA.

## 108 **2 Materials and methods**

### 109 **2.1 Experimental site**

110 The field experiment was conducted in a paddy rice field at Changshu Agroecological

111 Experimental Station (31°32'93"N, 120°41'88"E) in Jiangsu province, which is located in the TLR  
112 of China where the cropping system is primarily dominated by summer rice (*Oryza sativa* L.) and  
113 winter wheat (*Triticum aestivum* L.) rotation. The climate of the study area is subtropical  
114 monsoon, with a mean air temperature of 16.1°C and mean annual precipitation of 990 mm, of  
115 which 60–70% occurs during the rice-growing season. The daily mean temperature and  
116 precipitation during two rice-growing seasons from 2013 to 2014 are shown in Fig.1. The paddy  
117 soil is classified as Anthrosol, which develops from lacustrine sediments. The topsoil (0–20cm)  
118 has a pH of 7.68 (H<sub>2</sub>O). The bulk density is 1.16 g cm<sup>-3</sup>, the organic C content is 20.1 g C kg<sup>-1</sup>,  
119 the total N is 1.98 g kg<sup>-1</sup>, the available P is 11.83 mg kg<sup>-1</sup> and the available K is 126 mg kg<sup>-1</sup>.

## 120 **2.2 Experimental design and field management**

121 The field experiment included five treatments of different N fertilization rates for rice  
122 production: 0 (RN0), 120 (RN120), 180 (RN180), 240 (RN240) and 300 kg N ha<sup>-1</sup> (RN300,  
123 traditional N applied rate in the TLR). Consistent with local practices, wheat straws were  
124 harvested, chopped and fully incorporated into soil before rice transplantation in all treatments  
125 (Table 1). All of the treatments are laid out in a randomized block design with three replicates, and  
126 each plot covered an area of 3 m × 11 m (33 m<sup>2</sup>).

127 Rice is transplanted in the middle of June and harvested at the beginning of November. N  
128 fertilizer (in the form of urea) was split into three parts during the rice-growing season: 40% as  
129 basal fertilizer, 30% as tiller fertilizer, and 30% as panicle fertilizer. Phosphorus (in the form of  
130 calcium superphosphate) and potassium (in the form of potassium chloride) were applied as basal  
131 fertilizer at rates of 30 kg P<sub>2</sub>O<sub>5</sub> ha<sup>-1</sup> and 60 kg K<sub>2</sub>O ha<sup>-1</sup>, respectively. All basal fertilizers were  
132 thoroughly incorporated into the soil through plowing, while topdressing fertilizers were applied

133 evenly to the soil surface. According to local practices, the water regime of ‘flooding-midseason  
134 drainage-flooding-moist but non-waterlogged by intermittent irrigation’ was adopted. Details of  
135 the specific agricultural management practices for rice production are provided in Table 1.

### 136 **2.3 Gas fluxes and topsoil organic carbon sequestration rate**

137 The CH<sub>4</sub> and N<sub>2</sub>O fluxes during the rice-growing seasons of 2013 and 2014 were measured  
138 using a static chamber and gas chromatography technique. Details of the procedures used for  
139 sampling and analysis the gases were described in Xia et al. (2014).

140 Generally, it takes long-term observations over years to decades before the soil organic  
141 carbon (SOC) change is detectable (Yan et al., 2011). The SOC content changes of short-term field  
142 experiment couldn’t be correctly measured, due to the high variability of SOC during the  
143 preliminary several years of the experiment. Therefore, we used the following relationship  
144 between the straw input rate (kg C ha<sup>-1</sup> yr<sup>-1</sup>) and SOC sequestration rate (SOCSR, kg C ha<sup>-1</sup> yr<sup>-1</sup>),  
145 obtained through an on-going long-term straw application experiment in the same region, to  
146 calculate the SOCSR in this study (Xia et al., 2014):

$$147 \quad \text{SOCSR} = \text{Straw input rate} \times 0.0603 + 31.39 \quad (R^2 = 0.92); \quad (1)$$

148 This on-gonging long-term field experiment is also taking place at the Changshu  
149 Agroecological Experimental Station (since 1990), which includes three straw application levels:  
150 0, 4.5 t, and 9.0 t dry-weight ha<sup>-1</sup> yr<sup>-1</sup>. The equation (1) was established based on the results of  
151 22-year observation (Xia et al., 2014). Same agricultural management practices were applied to  
152 the on-going long-term experiment and the experiment of this study.

### 153 **2.4 Net global warming potential and greenhouse gas intensity**

154 The net global warming potential (NGWP, kg CO<sub>2</sub> eq ha<sup>-1</sup>) and greenhouse gas intensity

155 (GHGI, kg CO<sub>2</sub> eq kg<sup>-1</sup>) of rice production in the TLR was calculated using the following  
156 equations:

$$157 \quad \text{NGWP} = \sum_{i=1}^m \text{AI}_{i\text{CO}_2} + \text{CH}_4 \times 25 + \text{N}_2\text{O} \times 44/28 \times 298 - \text{SOCSR} \times 44/12; \quad (2)$$

$$158 \quad \text{GHGI} = \text{NGWP}/\text{rice yield}; \quad (3)$$

159 Here, AI<sub>iCO<sub>2</sub></sub> denotes the GHG emissions from the production and transportation of agricultural  
160 inputs, which are calculated by multiplying their application rates by their individual GHG  
161 emission factors, such as synthetic fertilizers, diesel oil, electricity and pesticides (Liang, 2009;  
162 Zhang et al., 2013). CH<sub>4</sub> (kg CH<sub>4</sub> ha<sup>-1</sup>), N<sub>2</sub>O (kg N ha<sup>-1</sup>) and SOCSR (kg C ha<sup>-1</sup> yr<sup>-1</sup>) represent  
163 the CH<sub>4</sub> and N<sub>2</sub>O emissions from rice production, and the SOC sequestration rate, respectively.

## 164 **2.5 Total Nr losses and Nr intensity**

165 The total Nr losses (kg N ha<sup>-1</sup>) and Nr intensity (NrI, g N kg<sup>-1</sup>) were calculated using the  
166 following equations:

$$167 \quad \text{Total Nr losses} = \sum_{i=1}^m \text{AI}_{i\text{Nr}} + (\text{NH}_3 + \text{N}_2\text{O} + \text{N}_{\text{Leaching}} + \text{N}_{\text{Runoff}})_{\text{rice}}; \quad (4)$$

$$168 \quad \text{NH}_3 \text{ volatilization} = 0.17 \times \text{N}_{\text{rate}} + 0.64; \quad (5)$$

$$169 \quad \text{N runoff} = 5.39 \times \text{Exp}(0.0054 \times \text{N}_{\text{rate}}); \quad (6)$$

$$170 \quad \text{N leaching} = 1.44 \times \text{Exp}(0.0037 \times \text{N}_{\text{rate}}); \quad (7)$$

$$171 \quad \text{NrI} = (1000 \times \text{Total Nr losses}) / \text{rice yield}; \quad (8)$$

172 Here, AI<sub>iNr</sub> denotes the Nr lost (mainly through N<sub>2</sub>O and NO<sub>x</sub> emissions) from the production and  
173 transportation of agricultural inputs (Liang, 2009; Zhang et al., 2013), while  
174 '(NH<sub>3</sub>+N<sub>2</sub>O+N<sub>Leaching</sub>+N<sub>Runoff</sub>)<sub>rice</sub>' represents the NH<sub>3</sub> volatilization, N<sub>2</sub>O emissions, N leaching  
175 and runoff during the rice-growing season. N<sub>rate</sub> represents the N fertilizer application rate. Nr  
176 empirical models (Equation 5, 6, 7) derived from a meta-analysis of published literature



177 concerning Nr losses from rice production in the TLR. Specific details regarding this literature  
178 survey are provided in Appendix A.

## 179 **2.6 Total environmental costs incurred by GHG and Nr releases and farmer's income**

180 The total environmental costs ( $\text{¥ ha}^{-1}$ ) incurred by GHG and Nr releases and farmer's income  
181 from rice production in the TLR were calculated based on the following equations:

$$182 \quad \text{Environmental costs} = \sum_{i=1}^n (\text{Nr}_i \text{A} \times \text{DC}_i) + \text{CO}_2 \text{A} \times \text{DC}_{\text{CO}_2}; \quad (9)$$

$$183 \quad \text{Farmer's income} = \text{rice yield} \times \text{rice price} - \text{input costs}; \quad (10)$$

184  $\text{Nr}_i \text{A}$  (kg N) represents the release amounts of certain Nr species (i), and  $\text{DC}_i$  ( $\text{¥ kg}^{-1}$  N) denotes  
185 the damage cost (DC) per kg of certain Nr (i).  $\text{CO}_2 \text{A}$  (ton) and  $\text{DC}_{\text{CO}_2}$  ( $\text{¥ ton}^{-1}$ ) represent the  $\text{CO}_2$   
186 emissions amount and global warming cost of  $\text{CO}_2$ , respectively.  $\text{N}_2\text{O}$  is both a GHG and Nr  
187 species, but its environmental cost was calculated as a GHG here. Because the cost of  $\text{N}_2\text{O}$   
188 emission as Nr species is to damage human health (Gu et al., 2012), but the effects of Nr losses on  
189 the damage costs of human health were not included in this study. The environmental costs mainly  
190 refer to the global warming incurred by GHG emissions, soil acidification incurred by  $\text{NH}_3$  and  
191  $\text{NO}_x$  emissions, and aquatic eutrophication caused by  $\text{NH}_3$  emissions, N leaching and runoff (Xia  
192 and Yan, 2012).

## 193 **2.7 Nitrogen use efficiency and $\text{N}_2\text{O}$ emission factor**

194 Nitrogen use efficiency (NUE) and  $\text{N}_2\text{O}$  emission factor ( $\text{EF}_d\%$ ) were respectively  
195 calculated by the following equations (Ma et al., 2013; Yan et al., 2014):

$$196 \quad \text{NUE} = (\text{U}_N - \text{U}_0) / \text{F}_N; \quad (11)$$

$$197 \quad \text{EF}_d\% = (\text{E}_N - \text{E}_0) / \text{F}_N; \quad (12)$$

198 Here,  $\text{U}_N$  is the plant N uptake ( $\text{kg ha}^{-1}$ ) measured in grain at physiological maturity in the N

199 fertilization treatments, while  $U_0$  is the N uptake measured in grain in the treatment without N  
200 fertilizer addition (RN0).  $E_N$  denotes the cumulative  $N_2O$  emissions in the N fertilization  
201 treatments, while  $E_0$  denotes the  $N_2O$  emissions in the RN0.  $F_N$  represents the application rate of N  
202 fertilizer. The N uptake in straw and grain was analysed via concentrated sulfuric acid digestion  
203 and the Kjeldahl method (Zhao et al., 2015).

## 204 **2.8 Statistical analysis**

205 Differences in seasonal  $CH_4$ ,  $N_2O$  emissions and rice yield of the two rice-growing seasons  
206 from 2013 to 2014 affected by fertilizer treatments, year and their interaction were examined by  
207 using a two-way analysis of variance (ANOVA) (Table 2). The grain yield, seasonal  $CH_4$  and  $N_2O$   
208 emissions, SOCSR and GHGI of different treatments were tested by analysis of variance, and  
209 mean values were compared by least significant difference (LSD) at the 5% level. All these  
210 analyses were carried out using the SPSS (Version 19.0, USA).

## 211 **3 Results and discussion**

### 212 **3.1 Rice yield and NUE**

213 The two-way ANOVA analyses indicated that the rice grain yields were significantly affected  
214 by the year and fertilizer treatment (Table 2). The farmer's practice plot (RN300) had an average  
215 rice grain yield of  $8395 \text{ kg ha}^{-1}$ , with an NUE of 31.35%, over the two growing seasons from  
216 2013 to 2014. Compared with RN300, reducing the N fertilizer rate by 20% (RN240) slightly  
217 improved the grain yield and NUE to  $8576 \text{ kg ha}^{-1}$  and 34.58%, respectively. Further N reduction,  
218 without additional agricultural managements, could decrease the rice yield by 8.15% (RN180) and  
219 15.18% (RN120) (Table 3). The response of rice yield to the synthetic N application rate in our  
220 study successfully fitted a quadratic model (Fig.2), as has been reported in previous studies (Xia

221 and Yan, 2012; Cui et al., 2013a). Reducing N application reasonably, therefore, is considered  
222 essential to reduce environmental costs, without sacrificing grain yield (Chen et al., 2014). Our  
223 study showed that lowering the N input adopted by local farmer ( $300 \text{ kg N ha}^{-1}$ ) by 20% could  
224 still enhance the grain yield and NUE. However, a further reduction of N 40% (RN180) would  
225 largely undermine the rice yield (Table 3).

226 Further reduction in N fertilizer may be achieved with improvements of agricultural  
227 managements, Ju et al. (2009) reported that, based on knowledge-based N managements, such as  
228 optimizing N fertilizer source, rate, timing and place (in accordance with crop demand), rice grain  
229 yield in the TLR was not significantly affected by a 30–60% N saving, while various Nr losses  
230 would endure a two-fold curbing. Similarly, Zhao et al. (2015) found that the NUE could be  
231 improved from 31% to 44%, even under a N reduction of 25% for rice production in the TLR,  
232 through the implementation of integrated soil-crop system managements. In the present study, the  
233 NUE was improved by 10% via a 20% N reduction, but it still falls behind the NUE values in the  
234 studies which received knowledge-based N managements. Previous studies have proven that straw  
235 incorporation exerted little impacts on grain yield. For instance, a meta-analysis conducted by  
236 Singh et al. (2005) have found that incorporation of crop straw produced no significant trend in  
237 improving crop yield in rice-based cropping systems. Moreover, based on a long-term straw  
238 incorporation experiment established since 1990 in the TLR, Xia et al. (2014) have reported that  
239 long-term incorporation of wheat straw only increased the rice yield by 1%. Therefore, in the  
240 present study, the effects of straw incorporation on rice yield were considered as inappreciable.

### 241 **3.2 CH<sub>4</sub>, N<sub>2</sub>O emissions and SOSCR**

242 Over the two rice-growing seasons from 2013 to 2014, all treatments showed similar patterns

243 of CH<sub>4</sub> fluxes, albeit with large inter-annual variation (Fig.3a). The seasonal average CH<sub>4</sub>  
244 emissions from all plots showed no significant difference, ranging from 289.53 kg CH<sub>4</sub> ha<sup>-1</sup> in the  
245 RN180 plot to 334.61 kg CH<sub>4</sub> ha<sup>-1</sup> in the RN120 plot (Table 4), much higher than observations  
246 conducted in the same region (Zou et al., 2005; Ma et al., 2013). This phenomenon can be  
247 attributed to the larger amounts of straw incorporation in this study (Table 1). Relative to the  
248 RN300 plot, CH<sub>4</sub> emissions from the RN240 plot decreased by 8% and 10%, during the  
249 rice-growing season of 2013 and 2014, respectively, although this effect was not statistically  
250 significant (Table 4).

251 Many studies have shown a clear linear relationship between CH<sub>4</sub> emissions and the amounts  
252 of applied organic matter (OM) (Shang et al., 2011; Xia et al., 2014). It is possible that the linear  
253 response of CH<sub>4</sub> emissions to OM inputs can become flat or even unobvious (Fig.S1), when the  
254 OM applied rates among different treatments were insignificant different (Table S1). It is  
255 unsurprising that no obvious relationship between CH<sub>4</sub> emissions and N fertilizer application rates  
256 was observed in this study (Fig.S1), because the effects of N fertilization on CH<sub>4</sub> production,  
257 transportation and oxidation are complex. For instance, N fertilization can provide methanogens  
258 with more carbon substrates in the rhizosphere of plants by stimulating the growth of rice biomass,  
259 thus promoting CH<sub>4</sub> production and transportation (Zou et al., 2005; Banger et al., 2012). On the  
260 other side, N enrichment could also enhance the activities of methanotrophs, therefore enhancing  
261 CH<sub>4</sub> oxidation (Xie et al., 2010; Yao et al., 2012).

262 The N<sub>2</sub>O fluxes were sporadic and pulse-like, and these fluxes showed large variations  
263 between different seasons, and the majority of the N<sub>2</sub>O peaks occurred after the application of N  
264 fertilizer (Fig.3b). The two-way ANOVA analyses indicated that the seasonal N<sub>2</sub>O emissions were

265 significantly affected by the year, the fertilizer treatment, and their interactions during the  
266 rice-growing seasons (Table 2). The average N<sub>2</sub>O emission, during the two rice-growing seasons,  
267 ranged from 0.05 kg N ha<sup>-1</sup> for the RN0 to 0.35 kg N ha<sup>-1</sup> for the RN300 (Table 4), which  
268 increased exponentially as the N fertilizer rate increased; this highlights that the reduction of N  
269 fertilizer rate is an effective approach to reduce the N<sub>2</sub>O emissions (Zou et al., 2005; Zhang et al.,  
270 2012). The average N<sub>2</sub>O emission factors varied between 0.03% and 0.1%, with an average of  
271 0.07%, which is comparable with previous studies (0.05–0.1%) conducted in the same region (Ma  
272 et al., 2013; Zhao et al., 2015).

273 The rice paddies have witnessed an increase in the SOC stock as a result of straw  
274 incorporation (Table 4). The estimated topsoil (0–20cm) SOCSR varied from 0.13 t C ha<sup>-1</sup> yr<sup>-1</sup> for  
275 the RN0 plot to 0.197 t C ha<sup>-1</sup> yr<sup>-1</sup> for the RN300 plot. The empirical model established through a  
276 long-term straw incorporation study in the same region was employed to evaluate the SOCSR in  
277 this study, which likely brought uncertainty into the results of this study. Under the same  
278 agricultural managements, soil and climatic conditions, cropping systems and straw types, it is  
279 reasonable to believe that the rates of straw C stabilizing into SOC (i.e. conversion efficiency of  
280 crop residue C into SOC) are similar between these two experiments (Mandal et al., 2008). It is  
281 reported that the conversion rates of crop straw to SOC in two main wheat/maize production  
282 regions in China, which have similar climatic conditions and agricultural practices, were very  
283 close, at 40.524 versus 40.607 kg SOC-C t<sup>-1</sup> dry-weight straw (Lu et al., 2009). Moreover, the  
284 current estimated SOCSR for rice production in the TLR (0.197 t C ha<sup>-1</sup> yr<sup>-1</sup>), is comparable to the  
285 estimation of 0.17 t C ha<sup>-1</sup> yr<sup>-1</sup> from Ma et al. (2013) in a study based on a paddy field experiment  
286 with OM incorporation in the same region. Therefore, we hold the opinion that the above SOCSR

287 calculation method is appropriate, and the uncertainty incurred by this method unlikely affects the  
288 main conclusions of this study.

289 The magnitude of the SOC increase is variable depending on the straw incorporation method,  
290 the degree of tillage, the cropping systems and etc. (Yan et al., 2011; Huang et al., 2013). Liu et al.  
291 (2014) suggested that straw incorporation in rice-based cropping systems requires an overall  
292 consideration, due to the direct incorporation promoting substantial CH<sub>4</sub> emissions. When  
293 converting to CO<sub>2</sub> eq, the SOCSR only offsets the CH<sub>4</sub> emissions by 6.2–9.2% in this study (Table  
294 4). This proportion is expected to increase provided that appropriate straw incorporation method  
295 (e.g., compost straw before incorporation) and conservative-tillage are adopted. Moreover,  
296 previous studies have shown that the combined adoption of conservative-tillage system with straw  
297 return had large advantages in increasing SOC stocks while reducing CH<sub>4</sub> emissions (Zhao et al.,  
298 2015a; Zhao et al., 2015b).

### 299 **3.3 NGWP and GHGI**

300 The average NGWP for all treatments varied from 8656 to 11550 kg CO<sub>2</sub> eq ha<sup>-1</sup> (Table 4).  
301 CH<sub>4</sub> emissions dominated the NGWP in all treatments, with the proportion ranging from 70.23%  
302 to 88.56%, while synthetic N fertilizer production was the secondary contributor (Table 4). In  
303 addition, SOC sequestration offset the positive GWP by 5.18–6.18% in the fertilization treatments.  
304 Compared to conventional practice (RN300), the NGWP in the 20% reduction N practice (RN240)  
305 decreased by 10.64%. Therein, 6.28% came from CH<sub>4</sub> reduction and 4.31% from N production  
306 savings (Table 4). The GHGI of rice production ranged from 1.20 (RN240) to 1.61 (RN0) kg CO<sub>2</sub>  
307 eq kg<sup>-1</sup>, which is higher than previous estimation of 0.24–0.74 kg CO<sub>2</sub> eq kg<sup>-1</sup> for rice production  
308 in other rice-upland crop rotation systems (Qin et al., 2010; Ma et al., 2013). Moreover, the GHGI

309 of current rice production in the TLR (RW300) was estimated to be 1.45 times that of the national  
310 average value estimated by Wang et al. (2014a), at 1.38 versus 0.95 kg CO<sub>2</sub> eq kg<sup>-1</sup>.

311 Such phenomenon was attributed to the following reasons. First, compared to above studies,  
312 current higher amounts of direct straw incorporation (2.9–6.2 Mg dry matter ha<sup>-1</sup>), before rice  
313 transplantation in the TLR, triggered substantial CH<sub>4</sub> emissions (290–335 kg CH<sub>4</sub> ha<sup>-1</sup>). Crop  
314 residue incorporation is regarded as a win-win strategy to benefit food security and mitigate  
315 climate change, due to the fact that it possesses a large potential for carbon sequestration (Lu et al.,  
316 2009). However, the GWP of straw-induced CH<sub>4</sub> emissions was reported to be 3.2–3.9 times that  
317 of the straw-induced SOCSR, which indicates direct straw incorporation in paddy soils worsens  
318 rather than mitigates climate changes, in terms of GWP (Xia et al., 2014). The SOC sequestration  
319 induced by straw incorporation only offset the positive GWP by 5.2–6.2% in this study. Sensible  
320 methods of straw incorporation should therefore be developed to reduce the substantial CH<sub>4</sub>  
321 emissions without compromising the build-up of SOC stock in the TLR.

322 Second, the high N application rate (300kg N ha<sup>-1</sup>) in the TLR combined with the large  
323 emission factor of N fertilizer production, 8.3 kg CO<sub>2</sub> eq kg<sup>-1</sup> N (Zhang et al., 2013), marked the  
324 sector of N fertilizer production as the secondary contributor to the GHGI (Table 4); this sector,  
325 however, was not involved in above-mentioned studies. Compared to local farmer's practices  
326 (RN300), reducing the N rate by 20% (RN240) lowered the GHGI by 13%, under the condition of  
327 straw incorporation, although this effect was not statistically significant (Table 4). Compared to  
328 RN240, however, further reduction of N rate (RN180 or RN120) increased the GHGI, due to the  
329 fact that rice yield was considerably reduced under excessive N reduction. Therefore, the joint  
330 application of reasonable N reduction and judicious method of straw incorporation would be

331 promising in reducing the GHGI for rice production in the TLR, in consideration of the current  
332 situation of simultaneous high inputs of N fertilizer and wheat straw.

### 333 **3.4 Various Nr losses and NrI**

334 The results of the meta-analysis indicated that N<sub>2</sub>O emissions, as well as N leaching and  
335 runoff, increased exponentially with an increase in N application rate (Fig.4b-d,  $P < 0.01$ ), while  
336 the response of NH<sub>3</sub> volatilization to N rates fitted the linear model best (Fig.4a,  $P < 0.01$ ). The  
337 estimated total Nr losses for all treatments varied from 39.3 to 91.7 kg N ha<sup>-1</sup> in the fertilization  
338 treatments (Table 5), accounting for 30.1–32.8% of N application rates. NH<sub>3</sub> volatilization  
339 dominated the NrI, with the proportion ranging from 53.5% to 57.4%, mainly because of the  
340 current fertilizer application method (soil surface broadcast) and high temperatures in the field  
341 (Zhao et al., 2012b; Li et al., 2014). N runoff was the second most important contributor (Table 5).  
342 Using <sup>15</sup>N micro-plots combined with three-year field measurements, Zhao et al. (2012b) reported  
343 that the total Nr losses from rice production in the TLR, under an N rate of 300 kg N ha<sup>-1</sup>, were 98  
344 kg N ha<sup>-1</sup>, which is comparable with our estimation of 91.69 kg N ha<sup>-1</sup> in the RN300 plot.  
345 Similarly, Xia and Yan (2011) estimated the Nr losses for life-cycle rice production in this region  
346 to be around 90 kg N ha<sup>-1</sup>. The high proportion (30.1–32.8%) of the applied N fertilizer released  
347 as Nr from rice production in the TLR, highlights the need to adopt reasonable N managements to  
348 increase the plant N uptake and reduce Nr losses (Ju et al., 2009).

349 The NrI of rice production in different plots varied between 2.14 g N kg<sup>-1</sup> (RN0) and 10.92 g  
350 N kg<sup>-1</sup> (RN300), which increased significantly as the N fertilizer rate increased (Table 5). The NrI  
351 for rice production in the TLR was estimated to be 10.92 g N kg<sup>-1</sup> (RN300), which is 68% higher  
352 than the national average value estimated by Chen et al. (2014), as a result of higher N fertilizer



353 input in the TLR. Under the condition of straw incorporation, reducing N application rate by 20%  
354 pulled the NrI down to 8.42 g N kg<sup>-1</sup> (RN240) (Table 5). Additional N reduction could further  
355 lower the NrI, but the rice yield would be compromised largely (Table 3). Previous studies have  
356 proven that direct incorporation of crop straw had insignificant effects on various Nr releases (Xia  
357 et al., 2014). Because the majority of N contented in the crop straw is not easily degraded by  
358 microorganisms in a short-term period, and can be stabilized in soil in a long-term period, rather  
359 than being released as various Nr (Huang et al., 2004; Xia et al., 2014). For instance, a  
360 meta-analysis, integrating 112 scientific assessments of the crop residue incorporation on the N<sub>2</sub>O  
361 emissions, has reported that the practice exerted no statistically significant effect on the N<sub>2</sub>O  
362 releases (Shan and Yan, 2013). Therefore, the effects of wheat straw incorporation on various Nr  
363 losses were considered as negligible in this study.

364 Extra attention should be paid to the interrelationship between the NrI and GHGI, which  
365 could provide hints for the mitigation purpose. For instance, N fertilizer production and  
366 application is an intermediate link between the NrI and GHGI (Chen et al., 2014). For the NrI, N  
367 fertilization promotes various Nr releases, exponentially or linearly (Fig.4), while N production  
368 and application made a secondary contribution to the GHGI (Table 4). Such interrelationships  
369 ought to be taken into account fully for any mitigation options pursued, in order to reduce the  
370 GHG emissions and Nr discharges from rice production simultaneously (Cui et al., 2013b; Cui et  
371 al., 2014).

### 372 **3.5 Economic evaluations of GHG emissions and Nr releases and their mitigation** 373 **potential**

374 The total environmental costs associated with the GHG emissions and Nr releases varied

375 from 1214 ¥ ha<sup>-1</sup> for the RN0 to 2399 ¥ ha<sup>-1</sup> for the RN300, which approximately accounted for  
376 10.44–13.47% of the farmer's income and 27.05–32.47% of the input costs, respectively (Table 6).  
377 CH<sub>4</sub> emission and NH<sub>3</sub> volatilization were the dominant contributors to the total environmental  
378 costs, respectively (Table 4 and Fig.5). The total damage costs to environment accounted for 13.5%  
379 of farmer's income under the current rice production in the TLR (RN300). Cutting the N rate from  
380 300 to 240 kg N ha<sup>-1</sup> slightly improved the farmer's income by 3.64%, while further N reduction  
381 would reduce the economic return of farmer's (Table 6).

382 GHG and Nr releases from rice production in the TLR are expected to possess a large  
383 potential for mitigation, due to the current situation of direct straw incorporation and higher N  
384 fertilizer inputs. Compared to traditional practice, a reduction of N application rate from 300 to  
385 240 kg N ha<sup>-1</sup> could alleviate 12.52% for GHGI (Table 4), 22.94% for NrI (Table 5), and 15.76%  
386 for environmental costs (Table 6). Further reduction in GHG and Nr releases (especially for CH<sub>4</sub>  
387 emissions and NH<sub>3</sub> volatilization) is possible, with the implementation of knowledge-based  
388 managements (Chen et al., 2014; Nayak et al., 2015). For the mitigation of Nr releases, switching  
389 the N fertilizer application method from surface broadcast to deep incorporation could largely  
390 lower the NH<sub>3</sub> volatilization from paddy soils (Zhang et al., 2012; Li et al., 2014). Moreover, other  
391 optimum N managements, such as applying controlled-release fertilizers and urease inhibitors,  
392 could also effectively increase the NUE and reducing the overall Nr losses (Chen et al., 2014). For  
393 the mitigation of GHG emissions, rather than being directly incorporated before rice  
394 transplantation, crop residues should be preferentially decomposed under aerobic conditions or  
395 used to produce biochar through pyrolysis, which could effectively reduce CH<sub>4</sub> emissions  
396 (Linguist et al., 2012; Xie et al., 2013). Moreover, these pre-treatments are also beneficial for

397 carbon sequestration and yield production (Woolf et al., 2010; Linqvist et al., 2012).

398       Most previous studies have merely focused on the quantification of GHG and Nr releases  
399 from food production from the perspective of environment assessments (Zhao et al., 2012b; Ma et  
400 al., 2013; Zhao et al., 2015). The perspective of economic evaluation is seldom implemented,  
401 which goes against encouraging farmer to participate in the abatement of GHG and Nr releases on  
402 their own initiative (Xia et al., 2014). The current pattern of rice production in the TLR incurs  
403 great costs to the environment, which accounted for 13.47% of the net economic return that farmer  
404 ultimately acquire (Table 6). Such an evaluation facilitates the translation of highly specialized  
405 scientific conclusions into monetary-based information that is more familiar and accessible for  
406 farmers, and therefore likely encouraging them to adopt eco-friendly agricultural managements  
407 (Wang et al., 2014b). Profitability is generally considered the main driver for farmer to change  
408 their management approach. Compared to traditional N application rate, a reduction of 20% would  
409 make environmental costs savings of 14%, whilst simultaneously improving the economic return  
410 of farmer's by 648 ¥ ha<sup>-1</sup> (Table 6). This represents an incentive for farmers to optimize their N  
411 fertilizer application rates, provided that such information is available to them.

412       Considering the fact that no specific carbon- and Nr-mitigation incentive programs, like the  
413 'Carbon Farming Initiative' in Australia (Lam et al., 2013), have been launched in China, an  
414 ecological compensation incentive mechanism should be established by governments. This should  
415 be a national subsidy program with a special compensation and award fund to cover the extra  
416 mitigation costs induced by the adoption of knowledge-based mitigation managements for farmers  
417 (Xia et al., 2016). Such a program would provide farmers with a tangible incentive, thus guiding  
418 them towards gradually adopting the mitigation managements, which could effectively curb GHG

419 emissions and Nr losses, but likely exert little positive effects on improving their net economic  
420 return (Xia et al., 2014). Examples include the composing of crop straws aerobically, or their use  
421 to produce biochar before incorporation (Xie et al., 2013), and encouraging the application of deep  
422 placement of N fertilizer (Wang et al., 2014b), as well as the application of enhanced-efficiency N  
423 fertilizers during the rice-growing season (Akiyama et al., 2010).

#### 424 **4 Conclusions**

425 Our results demonstrated that producing rice yield in the TLR released substantial GHG and  
426 Nr, which largely attributed to the current direct straw incorporation and excessive N fertilizer  
427 inputs. CH<sub>4</sub> emissions and NH<sub>3</sub> volatilization dominated the GHG and Nr releases, respectively.  
428 Reducing N application rate by 20% from the tradition level (300 kg N ha<sup>-1</sup>) could effectively  
429 decrease the GHG emissions, Nr releases and the damage costs to the environment, while  
430 increased the rice yield and improved farmer's income simultaneously. Agricultural managements,  
431 such as making straw decompose aerobically before its incorporation and optimizing the  
432 application method of N fertilizer, showed large potentials to further reduce the GHG (e.g., CH<sub>4</sub>  
433 emission) and Nr releases (e.g., NH<sub>3</sub> volatilization) from rice production in this region. Further  
434 studies are needed to evaluate the comprehensive effects of these managements on GHG  
435 emissions, Nr releases and farmer's economic returns.

#### 436 **Acknowledgements**

437 This study was financially supported by the CAS Strategic Priority Research Program (Grant  
438 No. XDA05020200) and the National Science and Technology Pillar Program (2013BAD11B00).  
439 We gratefully acknowledge the technical assistance provided by the Changshu Agroecological  
440 Experimental Station of the Chinese Academy of Sciences.

441 **Supplementary material**

442 Supplementary material (Appendix A) associated with this article can be found, in the online  
443 version.

444 **References**

445 Akiyama, H., Yan, X., Yagi, K.: Evaluation of effectiveness of enhanced-efficiency fertilizers as  
446 mitigation options for N<sub>2</sub>O and NO emissions from agricultural soils: meta-analysis,  
447 *Global Change Biol.*, 16, 1837-1846, 2010.

448 Banger, K., Tian, H., Lu, C.: Do nitrogen fertilizers stimulate or inhibit methane emissions from  
449 rice fields, *Global Change Biol.*, 18, 3259-3267, 2012.

450 Breiling, M., Hoshino, T., Matsushashi, R.: Contributions of Rice Production to Japanese  
451 Greenhouse Gas Emissions applying Life Cycle Assessment as a Methodology. Tokyo,  
452 Laboratory for Land Resource Sciences, Department of Biological and Environmental  
453 Engineering, Graduate School for Agriculture and Life Sciences, The University of Tokyo  
454 32, 1999.

455 Chen, X., Cui, Z., Fan, M., Vitousek, P., Zhao, M., Ma, W., Wang, Z., Zhang, W., Yan, X., Yang, J.:  
456 Producing more grain with lower environmental costs, *Nature*, 514, 486-489, 2014.

457 Cheng, K., Yan, M., Nayak, D., Pan, G., Smith, P., Zheng, J., Zheng, J.: Carbon footprint of crop  
458 production in China: an analysis of National Statistics data, *J. Agr. Sci.*, 153, 422-431,  
459 2014.

460 Cui, Z., Yue, S., Wang, G., Meng, Q., Wu, L., Yang, Z., Zhang, Q., Li, S., Zhang, F., Chen, X.:  
461 Closing the yield gap could reduce projected greenhouse gas emissions: a case study of  
462 maize production in China, *Global Change Biol.*, 19, 2467-2477, 2013a.

463 Cui, Z., Yue, S., Wang, G., Zhang, F., Chen, X.: In-season root-zone N management for mitigating  
464 greenhouse gas emission and reactive N losses in intensive wheat production, *Environ. Sci.*  
465 *Technol.*, 47, 6015-6022, 2013b.

466 Cui, Z., Wang, G., Yue, S., Wu, L., Zhang, W., Zhang, F., Chen, X.: Closing the N-use efficiency  
467 gap to achieve food and environmental security, *Environ. Sci. Technol.*, 48, 5780-5787,  
468 2014.

469 Galloway, J.N., Townsend, A.R., Erisman, J.W., Bekunda, M., Cai, Z., Freney, J.R., Martinelli,  
470 L.A., Seitzinger, S.P., Sutton, M.A.: Transformation of the nitrogen cycle: recent trends,  
471 questions, and potential solutions, *Science*, 320, 889-892, 2008.

472 Grassini, P., Cassman, K.G.: High-yield maize with large net energy yield and small global  
473 warming intensity, *Proc. Natl. Acad. Sci. U.S.A.*, 109, 1074-1079, 2012.

474 Gu, B., Ge, Y., Ren, Y., Xu, B., Luo, W., Jiang, H., Gu, B., Chang, J.: Atmospheric reactive  
475 nitrogen in China: Sources, recent trends, and damage costs, *Environ. Sci. Technol.*, 46,  
476 9420-9427, 2012.

477 Huang, T., Gao, B., Christie, P., Ju, X.: Net global warming potential and greenhouse gas intensity  
478 in a double-cropping cereal rotation as affected by nitrogen and straw management,  
479 *Biogeosciences*, 10, 13191-13229, 2013.

480 Huang, Y., Zou, J., Zheng, X., Wang, Y., Xu, X.: Nitrous oxide emissions as influenced by  
481 amendment of plant residues with different C: N ratios, *Soil Biol. Biochem.*, 36, 973-981,  
482 2004.

483 Ju, X., Xing, G., Chen, X., Zhang, S., Zhang, L., Liu, X., Cui, Z., Yin, B., Christie, P., Zhu, Z.:  
484 Reducing environmental risk by improving N management in intensive Chinese

485 agricultural systems, *Proc. Natl. Acad. Sci. U.S.A.*, 106, 3041-3046, 2009.

486 Lam, S.K., Chen, D., Mosier, A.R., Roush, R.: The potential for carbon sequestration in Australian  
487 agricultural soils is technically and economically limited, *Sci. Rep.*, 3, 2013.

488 Li, X., Xia, L., Yan, X.: Application of membrane inlet mass spectrometry to directly quantify  
489 denitrification in flooded rice paddy soil, *Biol. Fertil. Soils*, 50, 891-900, 2014.

490 Liang L.: Environmental impact assessment of circular agriculture based on life cycle  
491 assessment: Methods and case studies, PhD thesis, China Agricultural University, 2009 (in  
492 Chinese with an English abstract).

493 Linquist, B., Adviento-Borbe, M., Pittelkow, C., van Kessel, C., van Groenigen, K.: Fertilizer  
494 management practices and greenhouse gas emissions from rice systems: A quantitative  
495 review and analysis, *Field Crops Res.*, 135, 10-21, 2012.

496 Lu, F., Wang, X., Han, B., Ouyang, Z., Duan, X., Zheng, H., Miao, H.: Soil carbon sequestrations  
497 by nitrogen fertilizer application, straw return and no-tillage in China's cropland, *Global  
498 Change Biol.*, 15, 281-305, 2009.

499 Ma, J., Ma, E., Xu, H., Yagi, K., Cai, Z.: Wheat straw management affects CH<sub>4</sub> and N<sub>2</sub>O  
500 emissions from rice fields, *Soil Biol. Biochem.*, 41, 1022-1028, 2009.

501 Ma, Y., Kong, X., Yang, B., Zhang, X., Yan, X., Yang, J., Xiong, Z.: Net global warming potential  
502 and greenhouse gas intensity of annual rice–wheat rotations with integrated soil-crop  
503 system management, *Agric. Ecosyst. Environ.*, 164, 209-219, 2013.

504 Mandal, B., Majumder, B., Adhya, T., Bandyopadhyay, P., Gangopadhyay, A., Sarkar, D., Kundu,  
505 M., Choudhury, S.G., Hazra, G., Kundu, S.: Potential of double-cropped rice ecology to  
506 conserve organic carbon under subtropical climate, *Global Change Biol.*, 14, 2139-2151,

507 2008.

508 Nayak, D., Saetnan, E., Cheng, K., Wang, W., Koslowski, F., Cheng, Y., Zhu, W.Y., Wang, J., Liu,  
509 J., Moran, D.: Management opportunities to mitigate greenhouse gas emissions from  
510 Chinese agriculture, *Agric. Ecosyst. Environ.*, 209, 108-124, 2015.

511 Qin, Y., Liu, S., Guo, Y., Liu, Q., Zou, J.: Methane and nitrous oxide emissions from organic  
512 and conventional rice cropping systems in Southeast China, *Biol. Fertil. Soils*, 46,  
513 825-834, 2010.

514 Shan, J., Yan, X.Y.: Effects of crop residue returning on nitrous oxide emissions in  
515 agricultural soils, *Atmos. Environ.*, 71, 170-175, 2013.

516 Shang, Q., Yang, X., Gao, C., Wu, P., Liu, J., Xu, Y., Shen, Q., Zou, J., Guo, S.: Net annual global  
517 warming potential and greenhouse gas intensity in Chinese double rice-cropping systems:  
518 a 3-year field measurement in long-term fertilizer experiments, *Global Change Biol.*, 17,  
519 2196-2210, 2011.

520 Singh, Y., Singh, B., Timsina, J.: Crop residue management for nutrient cycling and improving  
521 soil productivity in rice-based cropping systems in the tropics, *Adv. Agron.*, 85, 269-407,  
522 2005.

523 Wang, W., Guo, L., Li, Y., Su, M., Lin, Y., De Perthuis, C., Ju, X., Lin, E., Moran, D.: Greenhouse  
524 gas intensity of three main crops and implications for low-carbon agriculture in China,  
525 *Climatic Change*, 128, 57-70, 2014a.

526 Wang, W., Koslowski, F., Nayak, D.R., Smith, P., Saetnan, E., Ju, X., Guo, L., Han, G., de  
527 Perthuis, C., Lin, E., Moran, D.: Greenhouse gas mitigation in Chinese agriculture:  
528 Distinguishing technical and economic potentials, *Global Environ. Chang.*, 26, 53-62,



529 2014b.

530 Woolf, D., Amonette, J.E., Street-Perrott, F.A., Lehmann, J., Joseph, S.: Sustainable biochar to  
531 mitigate global climate change, *Nat. Commun.*, 1, 56, 2010.

532 Xia, L., Wang, S., Yan, X.: Effects of long-term straw incorporation on the net global warming  
533 potential and the net economic benefit in a rice-wheat cropping system in China, *Agric.  
534 Ecosyst. Environ.*, 197, 118-127, 2014.

535 Xia, L., Ti, C., Li, B., Xia, Y., Yan, X.: Greenhouse gas emissions and reactive nitrogen  
536 releases during the life-cycles of staple food production in China and their mitigation  
537 potential, *Sci. Total Environ.*, 556, 116-125, 2016.

538 Xia, Y., Yan, X.: Life-cycle evaluation of nitrogen-use in rice-farming systems: implications for  
539 economically-optimal nitrogen rates, *Biogeosciences*, 8, 3159-3168, 2011.

540 Xia, Y., Yan, X.: Ecologically optimal nitrogen application rates for rice cropping in the Taihu  
541 Lake region of China, *Sustain. Sci.*, 7, 33-44, 2012.

542 Xie, B., Zheng, X., Zhou, Z., Gu, J., Zhu, B., Chen, X., Shi, Y., Wang, Y., Zhao, Z., Liu, C.:  
543 Effects of nitrogen fertilizer on CH<sub>4</sub> emission from rice fields: multi-site field observations,  
544 *Plant Soil*, 326, 393-401, 2010.

545 Xie, Z., Xu, Y., Liu, G., Liu, Q., Zhu, J., Tu, C., Amonette, J.E., Cadisch, G., Yong, J.W., Hu, S.:  
546 Impact of biochar application on nitrogen nutrition of rice, greenhouse-gas emissions and  
547 soil organic carbon dynamics in two paddy soils of China, *Plant Soil*, 370, 527-540, 2013.

548 Yan, X., Akiyama, H., Yagi, K., Akimoto, H.: Global estimations of the inventory and mitigation  
549 potential of methane emissions from rice cultivation conducted using the 2006  
550 Intergovernmental Panel on Climate Change Guidelines, *Global Biogeochem. Cycles*, 23,

551           2009.

552   Yan, X., Cai, Z., Wang, S., Smith, P.: Direct measurement of soil organic carbon content change in  
553           the croplands of China, *Global Change Biol.*, 17, 1487-1496, 2013.

554   Yan, X., Ti, C., Vitousek, P., Chen, D., Leip, A., Cai, Z., Zhu, Z.: Fertilizer nitrogen recovery  
555           efficiencies in crop production systems of China with and without consideration of the  
556           residual effect of nitrogen, *Environ. Res. Lett.*, 9, 095002, 2014.

557   Yao, Z., Zheng, X., Dong, H., Wang, R., Mei, B., Zhu, J.: A 3-year record of N<sub>2</sub>O and CH<sub>4</sub>  
558           emissions from a sandy loam paddy during rice seasons as affected by different nitrogen  
559           application rates, *Agric. Ecosyst. Environ.*, 152, 1-9, 2013.

560   Zhang, F., Cui, Z., Chen, X., Ju, X., Shen, J., Chen, Q., Liu, X., Zhang, W., Mi, G., Fan, M.:  
561           Integrated nutrient management for food security and environmental quality in China, *Adv.*  
562           *Agron.*, 116, 1-40, 2012.

563   Zhang, W., Dou, Z., He, P., Ju, X., Powlson, D., Chadwick, D., Norse, D., Lu, Y., Zhang, Y., Wu,  
564           L.: New technologies reduce greenhouse gas emissions from nitrogenous fertilizer in  
565           China, *Proc. Natl. Acad. Sci. U.S.A.*, 110, 8375-8380, 2013.

566   Zhao, M., Tian, Y., Ma, Y., Zhang, M., Yao, Y., Xiong, Z., Yin, B., Zhu, Z.: Mitigating gaseous  
567           nitrogen emissions intensity from a Chinese rice cropping system through an improved  
568           management practice aimed to close the yield gap, *Agric. Ecosyst. Environ.*, 203, 36-45,  
569           2015.

570   Zhao, X., Zhou, Y., Min, J., Wang, S., Shi, W., Xing, G.: Nitrogen runoff dominates water nitrogen  
571           pollution from rice-wheat rotation in the Taihu Lake region of China, *Agric. Ecosyst.*  
572           *Environ.*, 156, 1-11, 2012a.

573 Zhao, X., Zhou, Y., Wang, S., Xing, G., Shi, W., Xu, R., Zhu, Z.: Nitrogen balance in a highly  
574 fertilized rice-wheat double-cropping system in southern China, *Soil Sci. Soc. Am. J.*, 76,  
575 1068-1078, 2012b.

576 Zhao, X., Liu, S.L., Pu, C., Zhang, X.Q., Xue, J.F., Zhang, R., Wang, Y.Q., Lal, R., Zhang, H.L.,  
577 Chen, F.:Methane and nitrous oxide emissions under no-till farming in China: a  
578 meta-analysis. *Global Change Biol.*, 22, 1372-1384, 2015a.

579 Zhao, X., Zhang, R., Xue, J.F., Pu, C., Zhang, X.Q., Liu, S.L., Chen, F., Lal, R., Zhang, H.L.:  
580 Management-induced changes to soil organic carbon in China: A meta-analysis. *Adv.*  
581 *Agron.*, 134, 1-49, 2015b.

582 Zou, J., Huang, Y., Jiang, J., Zheng, X., Sass, R.L.: A 3-year field measurement of methane and  
583 nitrous oxide emissions from rice paddies in China: Effects of water regime, crop residue,  
584 and fertilizer application, *Global Biogeochem. Cycles*, 19, 2005.

585

586

587

588

589

590

591

592

593

594

595 **Table 1.** Field experimental treatments and agricultural management practices during the  
 596 rice-growing seasons of 2013 and 2014 in the Taihu Lake region

| Treatment <sup>a</sup>                                                                        | RN0                    | RN120     | RN180     | RN240     | RN300     |
|-----------------------------------------------------------------------------------------------|------------------------|-----------|-----------|-----------|-----------|
| Chemical fertilizer                                                                           |                        |           |           |           |           |
| application rate<br>(N:P <sub>2</sub> O <sub>5</sub> :K <sub>2</sub> O, kg ha <sup>-1</sup> ) | 0:30:60                | 120:30:60 | 180:30:60 | 240:30:60 | 300:30:60 |
| Split N application ratio                                                                     | ---                    | 4:3:3     | 4:3:3     | 4:3:3     | 4:3:3     |
| Straw application rate<br>(Mg dry matter ha <sup>-1</sup> )                                   | 3.94/2.88 <sup>b</sup> | 4.49/4.65 | 4.93/5.18 | 5.33/5.87 | 5.81/6.17 |
| Water regime <sup>c</sup>                                                                     | F-D-F-M                | F-D-F-M   | F-D-F-M   | F-D-F-M   | F-D-F-M   |
| Density (10 <sup>4</sup> plants ha <sup>-1</sup> )                                            | 2.5                    | 2.5       | 2.5       | 2.5       | 2.5       |

597 <sup>a</sup>RN0, RN120, RN180, RN240 and RN300 represent N application rates of 0, 120, 180, 240, 300  
 598 kg N ha<sup>-1</sup>, respectively.

599 <sup>b</sup>3.94/2.88 denote that straw application rates during the rice-growing seasons of 2013 and 2014  
 600 are 3.94 and 2.88 Mg dry matter ha<sup>-1</sup>, respectively.

601 <sup>c</sup>F, flooding; D, midseason drainage; M, moist but non-waterlogged by intermittent irrigation.

602

603

604

605

606

607

608 **Table 2.** Two-way ANOVA for the effects of fertilizer (F) application and year (Y) on CH<sub>4</sub> and  
 609 N<sub>2</sub>O emissions, and rice grain yields in rice paddies.

| Factor | df | CH <sub>4</sub> (kg ha <sup>-1</sup> ) |      |      | N <sub>2</sub> O (kg N ha <sup>-1</sup> ) |       |        | Yield (kg ha <sup>-1</sup> ) |       |        |
|--------|----|----------------------------------------|------|------|-------------------------------------------|-------|--------|------------------------------|-------|--------|
|        |    | SS                                     | F    | P    | SS                                        | F     | P      | SS                           | F     | P      |
| F      | 4  | 8739                                   | 0.79 | 0.55 | 0.33                                      | 12.46 | < 0.01 | 39297547                     | 32.96 | < 0.01 |
| Y      | 1  | 4492                                   | 1.62 | 0.22 | 0.11                                      | 16.41 | < 0.01 | 2810414                      | 9.43  | < 0.01 |
| F×Y    | 4  | 2532                                   | 0.23 | 0.92 | 0.18                                      | 7.1   | < 0.01 | 750639                       | 0.63  | 0.65   |
| Model  | 9  | 15763                                  | 0.63 | 0.77 | 0.62                                      | 10.52 | < 0.01 | 42858600                     | 15.97 | < 0.01 |
| Error  | 16 | 20                                     |      |      | 0.13                                      |       |        | 5962260                      |       |        |

610

611

612

613

614

615

616

617

618

619

620

621

622 **Table 3.** Rice yield and nitrogen use efficiency (NUE) for the two rice-growing seasons from 2013  
 623 to 2014 in the Taihu Lake region

| Year             | Treatment <sup>a</sup> | Yield (kg ha <sup>-1</sup> ) | NUE (%) |
|------------------|------------------------|------------------------------|---------|
| 2013             | RN0                    | 4829 ± 207                   | ---     |
|                  | RN120                  | 7079 ± 645                   | 23.40   |
|                  | RN180                  | 7655 ± 601                   | 28.12   |
|                  | RN240                  | 8273 ± 569                   | 33.61   |
|                  | RN300                  | 8029 ± 101                   | 30.63   |
| 2014             | RN0                    | 5919 ± 131                   | ---     |
|                  | RN120                  | 7598 ± 1077                  | 23.86   |
|                  | RN180                  | 7768 ± 570                   | 21.19   |
|                  | RN240                  | 8880 ± 435                   | 35.54   |
|                  | RN300                  | 8761 ± 369                   | 32.07   |
| Two-year average | RN0                    | 5374 ± 617d <sup>b</sup>     | ---     |
|                  | RN120                  | 7339 ± 843c                  | 23.63   |
|                  | RN180                  | 7711 ± 527bc                 | 24.66   |
|                  | RN240                  | 8576 ± 562a                  | 34.58   |
|                  | RN300                  | 8395 ± 468ab                 | 31.35   |

624 <sup>a</sup>Definitions of the treatment codes are given in the footnotes of Table 1.

625 <sup>b</sup>Mean±SD; different letters within the same column indicate a significant difference at  $p<0.05$ .

**Table 4.** The net global warming potential (NGWP) and greenhouse gas intensity (GHGI) for the two rice-growing seasons from 2013 to 2014 in the Taihu Lake region

| Year | Treatment <sup>a</sup> | CH <sub>4</sub> emission            | N <sub>2</sub> O emission | SOCSR                                  | Irrigation | N fertilizer<br>production             | Others | NGWP  | GHGI                                   |
|------|------------------------|-------------------------------------|---------------------------|----------------------------------------|------------|----------------------------------------|--------|-------|----------------------------------------|
|      |                        | kg CH <sub>4</sub> ha <sup>-1</sup> | kg N ha <sup>-1</sup>     | kg C ha <sup>-1</sup> yr <sup>-1</sup> |            | kg CO <sub>2</sub> eq ha <sup>-1</sup> |        |       | kg CO <sub>2</sub> eq kg <sup>-1</sup> |
| 2013 | RN0                    | 306.07 ± 41 <sup>b</sup>            | 0.08 ± 0.01               | 129.58                                 | 1170       | 0                                      | 217    | 8601  | 1.78                                   |
|      | RN120                  | 317.26 ± 92                         | 0.10 ± 0.01               | 154.07                                 | 1170       | 996                                    | 265    | 9845  | 1.39                                   |
|      | RN180                  | 287.8 ± 12                          | 0.13 ± 0.01               | 171.54                                 | 1170       | 1494                                   | 277    | 9568  | 1.25                                   |
|      | RN240                  | 273.27 ± 36                         | 0.14 ± 0.06               | 185.50                                 | 1170       | 1992                                   | 291    | 9670  | 1.17                                   |
|      | RN300                  | 305.13 ± 90                         | 0.16 ± 0.03               | 196.87                                 | 1170       | 2490                                   | 285    | 10927 | 1.36                                   |
| 2014 | RN0                    | 307.22 ± 47                         | 0.02 ± 0.05               | 129.58                                 | 1256       | 0                                      | 240    | 8711  | 1.47                                   |
|      | RN120                  | 351.96 ± 28                         | 0.09 ± 0.02               | 154.07                                 | 1256       | 996                                    | 276    | 10805 | 1.42                                   |

|          |       |              |               |          |      |      |     |       |               |
|----------|-------|--------------|---------------|----------|------|------|-----|-------|---------------|
|          | RN180 | 291.25 ± 18  | 0.24 ± 0.04   | 171.54   | 1256 | 1494 | 280 | 9795  | 1.26          |
|          | RN240 | 317.65 ± 28  | 0.34 ± 0.12   | 185.50   | 1256 | 1992 | 303 | 10972 | 1.24          |
|          | RN300 | 343.8 ± 61   | 0.53 ± 0.21   | 196.87   | 1256 | 2490 | 301 | 12169 | 1.39          |
| Two-year | RN0   | 306.65 ± 39a | 0.05 ± 0.05b  | 129.58c  | 1213 | 0    | 229 | 8656  | 1.61 ± 0.25a  |
| average  | RN120 | 334.61 ± 64a | 0.09 ± 0.02b  | 154.07bc | 1213 | 996  | 271 | 10322 | 1.40 ± 0.16b  |
|          | RN180 | 289.53 ± 14a | 0.18 ± 0.07ab | 171.54ab | 1213 | 1494 | 279 | 9679  | 1.25 ± 0.09bc |
|          | RN240 | 295.46 ± 38a | 0.24 ± 0.14ab | 185.50ab | 1213 | 1992 | 297 | 10321 | 1.20 ± 0.08cd |
|          | RN300 | 324.47 ± 72a | 0.35 ± 0.25a  | 196.87a  | 1213 | 2490 | 293 | 11550 | 1.38 ± 0.21bc |

<sup>a</sup>Definitions of treatment codes are given in the footnotes of Table 1.

<sup>b</sup>Mean ± SD; different letters within same column indicate a significant difference at  $p < 0.05$ .



**Table 5.** The seasonal average reactive N (Nr) losses and reactive N intensity (NrI) for the two rice-growing seasons from 2013 to 2014 in the Taihu Lake region

| Treatment <sup>a</sup> | NH <sub>3</sub> | N      | N        | N <sub>2</sub> O | NO <sub>x</sub> | Total Nr | NrI                  |
|------------------------|-----------------|--------|----------|------------------|-----------------|----------|----------------------|
|                        | volatilization  | runoff | leaching | emission         | emission        | losses   |                      |
|                        |                 |        |          |                  |                 |          |                      |
|                        |                 |        |          |                  |                 |          |                      |
| kg N ha <sup>-1</sup>  |                 |        |          |                  |                 |          | g N kg <sup>-1</sup> |
| RN0                    | 0.64            | 5.39   | 1.44     | 0.07             | 3.96            | 11.50    | 2.14                 |
| RN120                  | 21.04           | 10.30  | 2.24     | 0.12             | 5.62            | 39.32    | 5.36                 |
| RN180                  | 31.24           | 14.25  | 2.80     | 0.21             | 6.44            | 54.93    | 7.12                 |
| RN240                  | 41.44           | 19.70  | 3.50     | 0.27             | 7.26            | 72.17    | 8.42                 |
| RN300                  | 51.64           | 27.24  | 4.37     | 0.38             | 8.07            | 91.69    | 10.92                |

<sup>a</sup>Definitions of treatment codes are given in the footnotes of Table 1.

**Table 6.** The economic indicators (two-season average) for rice production of the growing seasons from 2013 to 2014 in the Taihu Lake region (unit: ¥ ha<sup>-1</sup>)

| Treatment <sup>a</sup> | Yield income <sup>b</sup> | Input costs <sup>c</sup> | Farmer's income <sup>d</sup> | Environmental costs <sup>e</sup> |             |
|------------------------|---------------------------|--------------------------|------------------------------|----------------------------------|-------------|
|                        |                           |                          |                              | GHG emissions                    | Nr releases |
| RN0                    | 16125                     | 4493                     | 11632                        | 1143                             | 71          |
| RN120                  | 22020                     | 6104                     | 15916                        | 1363                             | 376         |
| RN180                  | 23130                     | 6542                     | 16588                        | 1278                             | 535         |
| RN240                  | 25725                     | 7277                     | 18448                        | 1362                             | 700         |
| RN300                  | 25185                     | 7385                     | 17800                        | 1525                             | 874         |

<sup>a</sup>Definitions of treatment codes are given in the footnotes of Table 1.

<sup>b</sup>Yield income = rice yield × rice price.

<sup>c</sup>Input costs denote the economic input of purchasing various agricultural materials and hiring labours.

<sup>d</sup>Farmer's income = Yield income – Input costs.

<sup>e</sup>Environmental costs denoted the sum of the acidification costs, eutrophication costs and global warming costs incurred by GHG emissions and Nr releases. The cost prices of GHG and Nr releases are as followed: GHG emission, 132 ¥ t<sup>-1</sup> CO<sub>2</sub> eq (Xia et al., 2014); NH<sub>3</sub> volatilization, 13.12 ¥ kg<sup>-1</sup> N; N leaching, 6.12 ¥ kg<sup>-1</sup> N; N runoff, 3.64 ¥ kg<sup>-1</sup> N; NO<sub>x</sub> emission, 8.7 ¥ kg<sup>-1</sup> N (Xia and Yan, 2011).

## Figure captions

**Fig. 1. Seasonal variations in the daily precipitation and the temperature during the two rice-growing seasons of (a) 2013 and (b) 2014.**

**Fig.2. Relationship between N fertilizer application rate and average rice yield over the two rice-growing seasons of 2013 and 2014 in the Taihu Lake region.** The vertical bars represent standard errors.

**Fig.3. Seasonal variations in (a) CH<sub>4</sub> and (b) N<sub>2</sub>O fluxes during the two rice-growing seasons from 2013 to 2014 in the Taihu Lake region.** The arrow indicates N fertilizer application. The vertical bars represent standard errors.

**Fig.4. Relationship between N fertilizer application rate and (a) NH<sub>3</sub> volatilization, (b) N runoff, (c) N leaching and (d) N<sub>2</sub>O emissions for rice production in the Taihu Lake region.** These relationships were obtained through a meta-analysis.

**Fig.5. Seasonal average total environmental costs incurred by greenhouse gas (GHG) emissions and reactive N (Nr) losses for rice production in Taihu Lake region.**

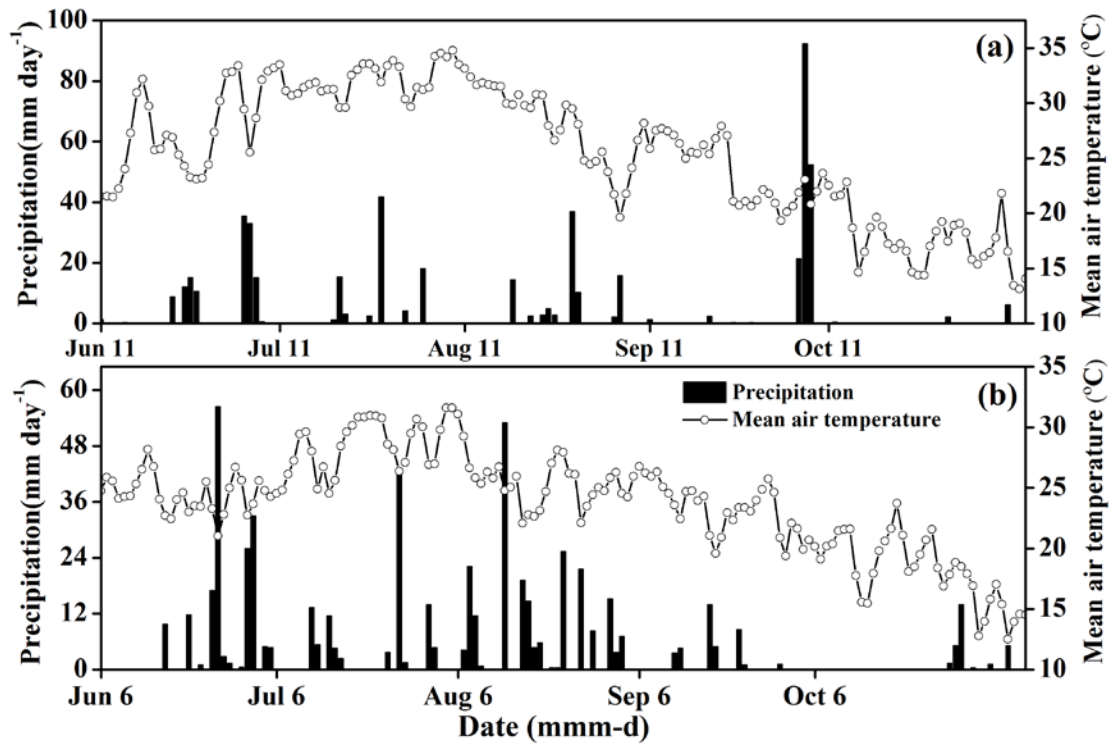

Fig.1

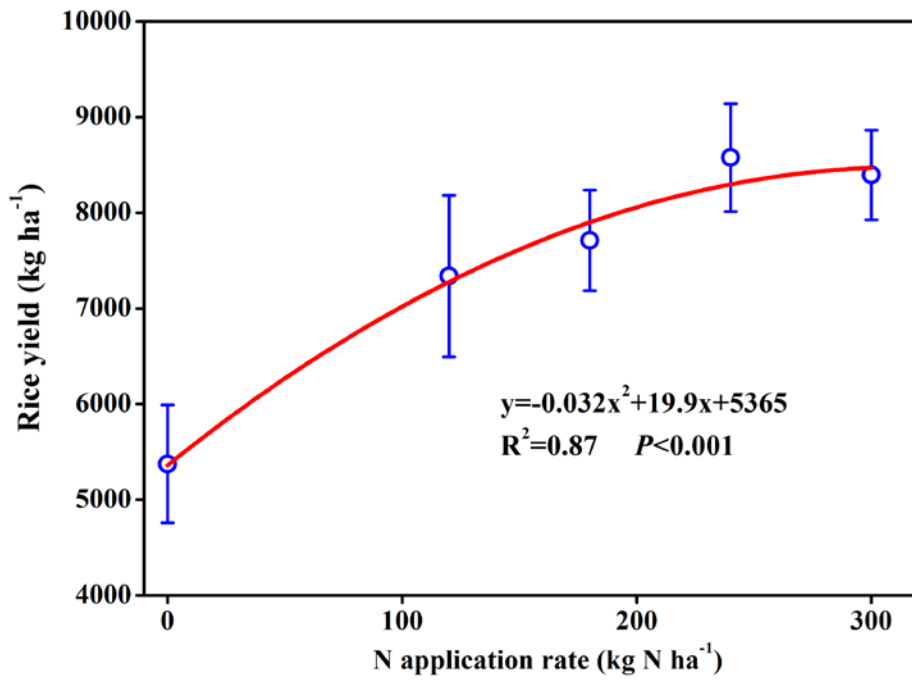

Fig.2

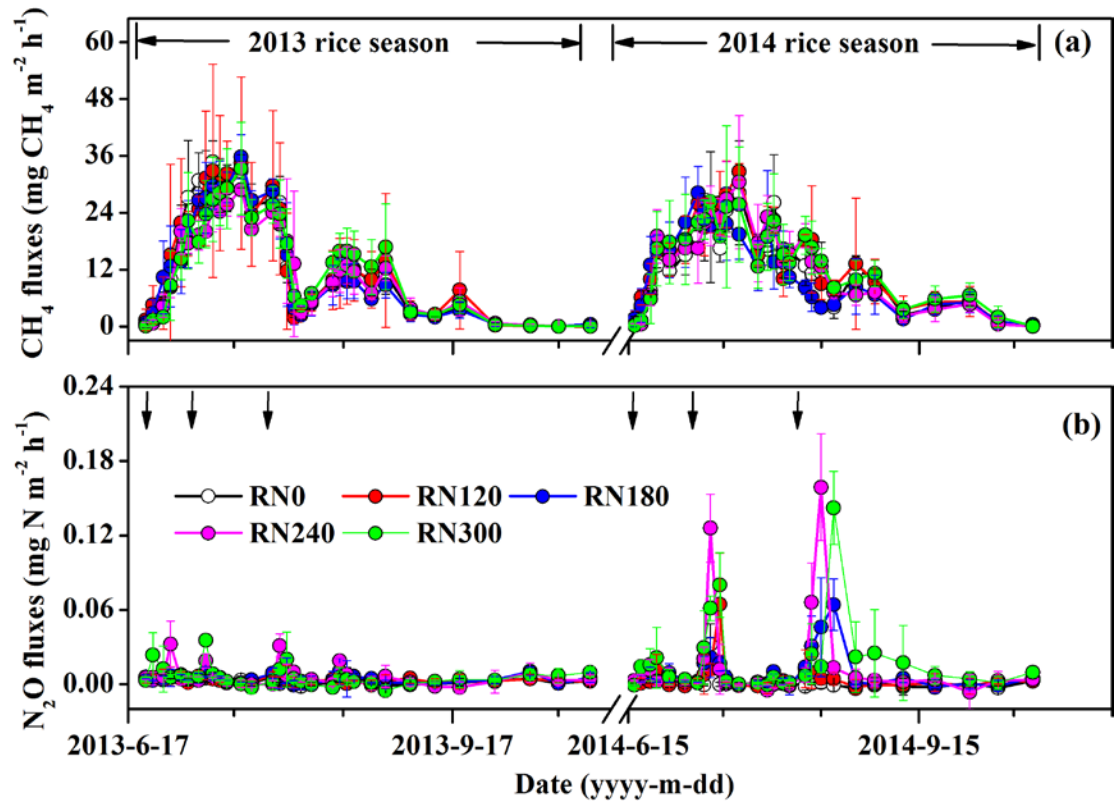

Fig.3

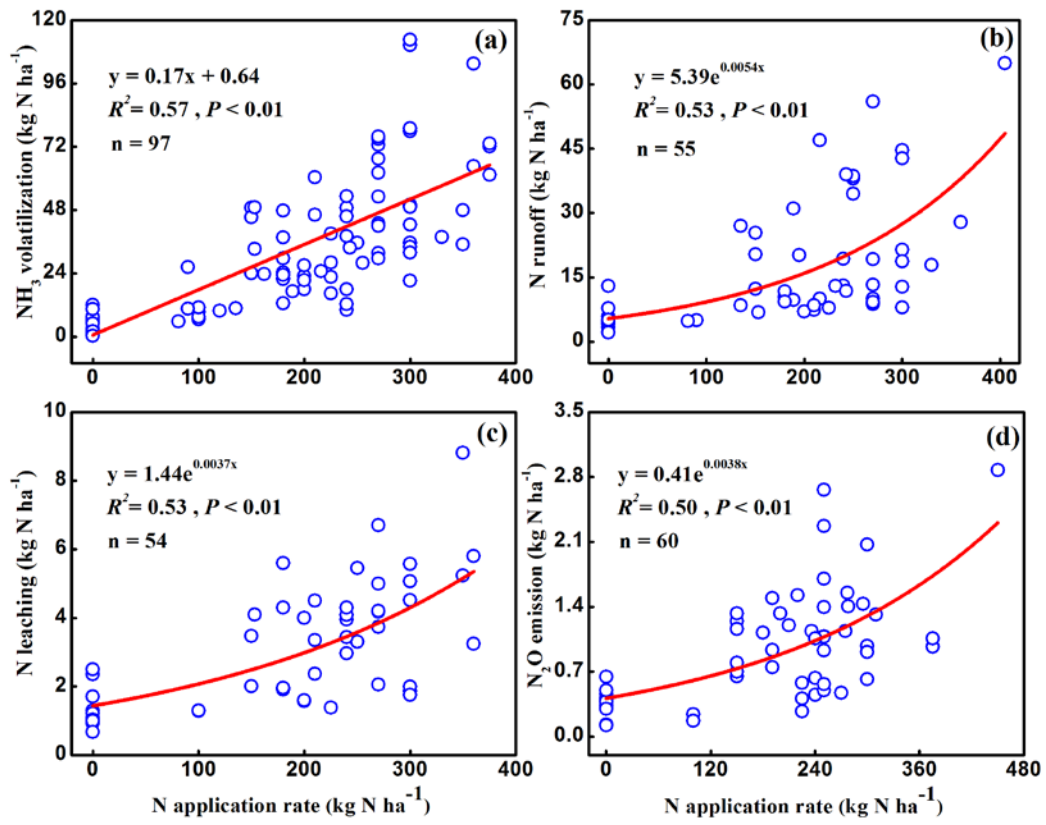

**Fig.4**

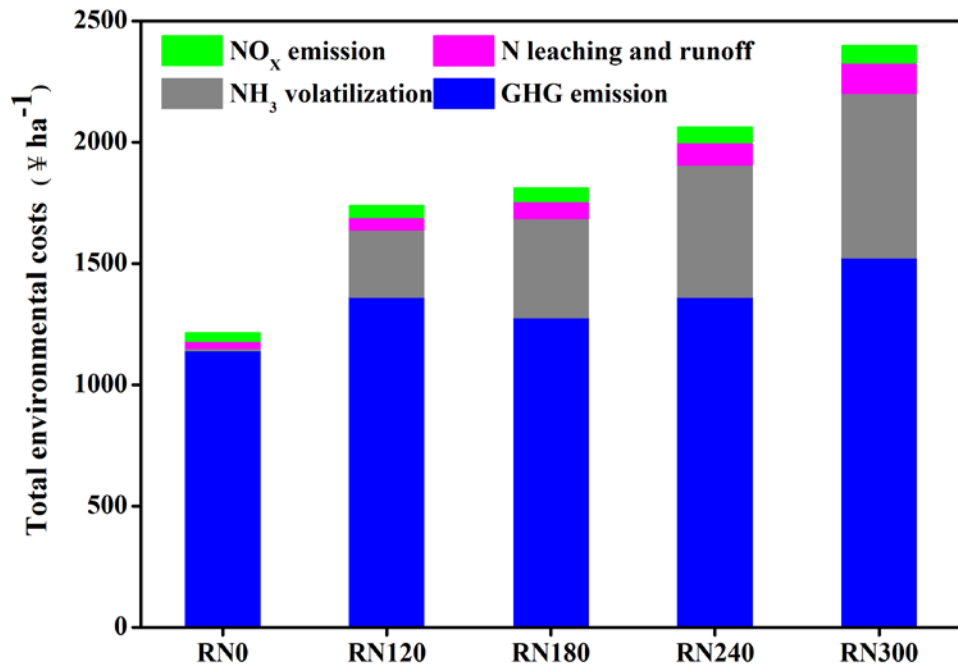

Fig.5
